# Supplementary material for: Integrating informatics tools and portable sequencing technology for rapid detection of resistance to anti-tuberculous drugs
Source: PubMed Central journal article supplement (PMC6591855; doi:10.1186/s13073-019-0650-x), 2019-06-24
Supplement: 13073_2019_650_MOESM2_ESM.pdf [file 13073_2019_650_MOESM2_ESM.pdf]

**S1 Table**  
**New features in *TBProfiler***

---

| Feature                                     | Information                                                                                                                                                                                                                                                                            |
|---------------------------------------------|----------------------------------------------------------------------------------------------------------------------------------------------------------------------------------------------------------------------------------------------------------------------------------------|
| Easy installation                           | Available to install through <i>Conda</i>                                                                                                                                                                                                                                              |
| Flexible output                             | Output in <i>json</i> , <i>txt</i> , <i>pdf</i> , and <i>html</i> formats with customisation of reportable metrics                                                                                                                                                                     |
| Resistance mutation proportion              | Estimation of the proportion of reads supporting resistance mutations, which can be used to detect hetero-resistance                                                                                                                                                                   |
| Multi-sample reports                        | Summarising results across multiple isolates and generation of tables and configuration files for <i>iTOL</i>                                                                                                                                                                          |
| Deletion calling                            | Use of <i>Delly</i> software to call large deletions, which may cause resistance                                                                                                                                                                                                       |
| Easy library updating                       | The latest version of the <i>TBProfiler</i> mutation library can be downloaded from GitHub and loaded with a single command                                                                                                                                                            |
| Use of different databases                  | Different mutation libraries can be easily loaded and used instead of the standard <i>TBProfiler</i> mutation library                                                                                                                                                                  |
| Oxford Nanopore Technology (ONT) data ready | Different workflow implemented on ONT data with <i>minimap2</i> software used for mapping and optimised parameters for <i>bcftools</i> variant calling                                                                                                                                 |
| Parallelised                                | Most of the computationally intensive steps can be parallelised and will scale from running on a laptop to a powerful high-performance computing cluster                                                                                                                               |
| BAM input                                   | Assuming the BAM files have been generated with the H37Rv (GCA_000195955.2) reference, they can be used as input to <i>TBProfiler</i> . This will allow the user to skip the most computationally intensive step of read trimming and mapping                                          |
| Easy library modification and generation    | The mutation library is hosted in a separate GitHub repository allowing for its easy inspection and modification. Mutations can be specified using mutations or a range of amino acids/nucleotides. Support for frameshifts, premature stop codons and large deletions is also present |

---

**S2 Table**  
**Distribution of drug resistance types by lineage**

| Lineage         | Total        | Susceptible   | Drug-resistant | MDR-TB       | XDR-TB     |
|-----------------|--------------|---------------|----------------|--------------|------------|
| lineage1        | 1885 (10.9%) | 1518          | 210            | 151          | 6          |
| lineage2        | 3721 (21.6%) | 1464          | 486            | 1612         | 159        |
| lineage3        | 2886 (16.7%) | 2209          | 217            | 432          | 28         |
| lineage4        | 8531 (49.5%) | 5775          | 970            | 1634         | 152        |
| lineage5        | 35 (0.2%)    | 21            | 6              | 8            | 0          |
| lineage6        | 37 (0.2%)    | 31            | 3              | 3            | 0          |
| lineage7        | 1 (0.0%)     | 1             | 0              | 0            | 0          |
| <i>M. bovis</i> | 129 (0.7%)   | 40            | 86             | 3            | 0          |
| Total           | 17239 (100%) | 11068 (64.2%) | 1981 (11.5%)   | 3845 (22.3%) | 345 (2.0%) |

MDR-TB = multi-drug-resistant TB; XDR-TB = extensively-drug-resistant TB; Drug-resistant = non-MDR-TB/XDR-TB resistance

**S3 Table****Number of tested isolates for each drug**

| Drug             | No. Tested | % tested | Susceptible | Resistant | Resistant % |
|------------------|------------|----------|-------------|-----------|-------------|
| Rifampicin       | 17040      | 98.8     | 12473       | 4567      | 26.8%       |
| Isoniazid        | 16955      | 98.4     | 11599       | 5356      | 31.6%       |
| Ethambutol       | 15334      | 88.9     | 12698       | 2636      | 17.2%       |
| Pyrazinamide     | 12381      | 71.8     | 10447       | 1934      | 15.6%       |
| Streptomycin     | 5366       | 31.1     | 3992        | 1374      | 25.6%       |
| Ethionamide      | 987        | 5.7      | 649         | 338       | 34.2%       |
| Amikacin         | 1480       | 8.6      | 1138        | 342       | 23.1%       |
| Capreomycin      | 1783       | 10.3     | 1388        | 395       | 22.2%       |
| Kanamycin        | 1908       | 11.1     | 1252        | 656       | 34.4%       |
| Ciprofloxacin    | 406        | 2.4      | 342         | 64        | 15.8%       |
| Moxifloxacin     | 905        | 5.2      | 798         | 107       | 11.8%       |
| Ofloxacin        | 2060       | 11.9     | 1543        | 517       | 25.1%       |
| Fluoroquinolones | 2532       | 14.7     | 1944        | 588       | 23.2%       |
| PAS              | 418        | 2.4      | 373         | 45        | 10.8%       |
| Cycloserine      | 402        | 2.3      | 295         | 107       | 26.6%       |
| MDR-TB           | 16879      | 97.9     | 11293       | 4190      | 24.8%       |
| XDR-TB           | 2026       | 11.8     | 1681        | 345       | 17.0%       |

PAS = Para-aminosalicylic acid; MDR-TB = multi-drug-resistant TB; XDR-TB = extensively-drug-resistant TB

**S4 Table**  
**ENA project codes of isolates used in the study**

| Project                        | Total Number | Susceptible | Drug-resistant | MDR-TB | XDR-TB |
|--------------------------------|--------------|-------------|----------------|--------|--------|
| cryptic_nejm_2018 <sup>1</sup> | 8427         | 5174        | 824            | 2429   | 0      |
| PRJNA282721 <sup>2</sup>       | 1892         | 1507        | 290            | 90     | 5      |
| PRJEB2794 <sup>3</sup>         | 1334         | 1244        | 82             | 8      | 0      |
| PRJEB7056                      | 1105         | 887         | 177            | 41     | 0      |
| PRJEB9680 <sup>2</sup>         | 1062         | 731         | 80             | 249    | 2      |
| PRJEB10385 <sup>4</sup>        | 713          | 102         | 212            | 304    | 95     |
| PRJEB2221 <sup>2</sup>         | 366          | 334         | 26             | 6      | 0      |
| PRJNA183624 <sup>5</sup>       | 333          | 87          | 42             | 139    | 65     |
| PRJEB2358 <sup>6</sup>         | 325          | 293         | 30             | 2      | 0      |
| PRJEB7669 <sup>7</sup>         | 246          | 0           | 3              | 232    | 11     |
| PRJNA235852 <sup>8</sup>       | 213          | 158         | 35             | 20     | 0      |
| PRJEB5162 <sup>9</sup>         | 199          | 181         | 16             | 2      | 0      |
| PRJNA187550 <sup>10</sup>      | 161          | 44          | 0              | 94     | 23     |
| PRJNA200335 <sup>11</sup>      | 134          | 25          | 6              | 46     | 57     |
| PRJEB11653 <sup>12</sup>       | 127          | 14          | 78             | 35     | 0      |
| PRJEB14199 <sup>13</sup>       | 124          | 0           | 34             | 14     | 76     |
| PRJEB2777 <sup>14</sup>        | 98           | 98          | 0              | 0      | 0      |
| PRJEB7281 <sup>15</sup>        | 94           | 37          | 15             | 41     | 1      |
| PRJEB15857 <sup>16</sup>       | 56           | 22          | 8              | 26     | 0      |
| PRJEB6945 <sup>17</sup>        | 51           | 51          | 0              | 0      | 0      |
| PRJEB7727 <sup>18</sup>        | 47           | 24          | 17             | 6      | 0      |
| PRJEB2424 <sup>19</sup>        | 45           | 3           | 2              | 40     | 0      |
| PRJEB2138 <sup>20</sup>        | 37           | 9           | 4              | 14     | 10     |
| PRJNA49659 <sup>21</sup>       | 28           | 28          | 0              | 0      | 0      |
| PRJNA376471 <sup>22</sup>      | 19           | 12          | 0              | 7      | 0      |
| PRJEB6276 <sup>23</sup>        | 3            | 3           | 0              | 0      | 0      |

MDR-TB = multi-drug-resistant TB; XDR-TB = extensively-drug-resistant TB; Drug-resistant = non-MDR-TB/XDR-TB resistance

### References

1. The CRYPTIC Consortium and the 100, 000 Genomes Project. Prediction of Susceptibility to First-Line Tuberculosis Drugs by DNA Sequencing. *N. Engl. J. Med.* **379**, 1403–1415 (2018).
2. Walker, T. M. *et al.* Whole-genome sequencing for prediction of *Mycobacterium tuberculosis* drug susceptibility and resistance: a retrospective cohort study. *Lancet Infect. Dis.* **15**, 1193–1202 (2015).
3. Guerra-Assunção, J. A. *et al.* Recurrence due to Relapse or Reinfection With *Mycobacterium tuberculosis* : A Whole-Genome Sequencing Approach in a Large, Population-Based Cohort With a High HIV Infection Prevalence and Active Follow-up. *J. Infect. Dis.* **211**, 1154–1163 (2015).
4. Coll, F. *et al.* Genome-wide analysis of multi- and extensively drug-resistant *Mycobacterium tuberculosis*. *Nat. Genet.* **50**, 307–316 (2018).
5. Cohen, K. A. *et al.* Evolution of Extensively Drug-Resistant Tuberculosis over Four Decades:

- Whole Genome Sequencing and Dating Analysis of Mycobacterium tuberculosis Isolates from KwaZulu-Natal. *PLoS Med.* **12**, e1001880 (2015).
6. Guerra-Assunção, J. *et al.* Large-scale whole genome sequencing of *M. tuberculosis* provides insights into transmission in a high prevalence area. *Elife* **4**, (2015).
  7. Eldholm, V. *et al.* Four decades of transmission of a multidrug-resistant Mycobacterium tuberculosis outbreak strain. *Nat. Commun.* **6**, 7119 (2015).
  8. Manson, A. L. *et al.* Genomic analysis of globally diverse Mycobacterium tuberculosis strains provides insights into the emergence and spread of multidrug resistance. *Nat. Genet.* (2017). doi:10.1038/ng.3767
  9. Walker, T. M. *et al.* Assessment of Mycobacterium tuberculosis transmission in Oxfordshire, UK, 2007-12, with whole pathogen genome sequences: an observational study. *Lancet. Respir. Med.* **2**, 285–292 (2014).
  10. Zhang, H. *et al.* Genome sequencing of 161 Mycobacterium tuberculosis isolates from China identifies genes and intergenic regions associated with drug resistance. *Nat. Genet.* **45**, 1255–1260 (2013).
  11. Wollenberg, K. R. *et al.* Whole-Genome Sequencing of Mycobacterium tuberculosis Provides Insight into the Evolution and Genetic Composition of Drug-Resistant Tuberculosis in Belarus. *J. Clin. Microbiol.* **55**, 457–469 (2017).
  12. Phelan, J. *et al.* Mycobacterium tuberculosis whole genome sequencing and protein structure modelling provides insights into anti-tuberculosis drug resistance. *BMC Med.* **14**, 31 (2016).
  13. Dheda, K. *et al.* Outcomes, infectiousness, and transmission dynamics of patients with extensively drug-resistant tuberculosis and home-discharged patients with programmatically incurable tuberculosis: a prospective cohort study. *Lancet Respir. Med.* **5**, 269–281 (2017).
  14. Bryant, J. M. *et al.* Whole-genome sequencing to establish relapse or re-infection with Mycobacterium tuberculosis: a retrospective observational study. *Lancet. Respir. Med.* **1**, 786–92 (2013).
  15. Merker, M. *et al.* Evolutionary history and global spread of the Mycobacterium tuberculosis Beijing lineage. *Nat. Genet.* **47**, 242–249 (2015).
  16. Senghore, M. *et al.* Whole-genome sequencing illuminates the evolution and spread of multidrug-resistant TB in Southwest Nigeria. *PLoS One* **12**, e0184510 (2017).
  17. Roetzer, A. *et al.* Whole Genome Sequencing versus Traditional Genotyping for Investigation of a Mycobacterium tuberculosis Outbreak: A Longitudinal Molecular Epidemiological Study. *PLoS Med.* **10**, e1001387 (2013).
  18. Feuerriegel, S. *et al.* PhyResSE: a Web Tool Delineating Mycobacterium tuberculosis Antibiotic Resistance and Lineage from Whole-Genome Sequencing Data. *J. Clin. Microbiol.* **53**, 1908–1914 (2015).
  19. Clark, T. G. *et al.* Elucidating emergence and transmission of multidrug-resistant tuberculosis in treatment experienced patients by whole genome sequencing. *PLoS One* **8**, e83012 (2013).
  20. Casali, N. *et al.* Microevolution of extensively drug-resistant tuberculosis in Russia. *Genome Res.* **22**, 735–745 (2012).
  21. Gardy, J. L. *et al.* Whole-Genome Sequencing and Social-Network Analysis of a Tuberculosis Outbreak. *N. Engl. J. Med.* **364**, 730–739 (2011).
  22. Chatterjee, A., *et al.* Whole genome sequencing of clinical strains of Mycobacterium tuberculosis from Mumbai, India: A potential tool for determining drug-resistance and strain lineage. *Tuberculosis* **107**, 63–72 (2017).
  23. Kohl, T. A. *et al.* Whole-genome-based Mycobacterium tuberculosis surveillance: a standardized, portable, and expandable approach. *J. Clin. Microbiol.* **52**, 2479–86 (2014).

**S5 Table****Raw sequence data and mapping statistics for the three MinION sequenced isolates**

| Sample<br>[replicate] | No. reads | Median<br>read length | % reads<br>mapped | Median<br>depth | % Genome<br>covered<br>>10-fold |
|-----------------------|-----------|-----------------------|-------------------|-----------------|---------------------------------|
| por5 [01]             | 86767     | 2397.5                | 98.1%             | 36              | 95.4%                           |
| por5 [02]             | 113371    | 1924                  | 97.7%             | 36              | 96.3%                           |
| por5 [03]             | 129161    | 1664                  | 95.9%             | 35              | 95.9%                           |
| por5 [04]             | 223319    | 1292                  | 96.3%             | 61              | 92.9%                           |
| por5 [05]             | 157771    | 963                   | 94.5%             | 33              | 96.2%                           |
| por5 [06]             | 91439     | 2049                  | 97.6%             | 30              | 96.1%                           |
| por5 [07]             | 143420    | 1726                  | 96.0%             | 39              | 96.1%                           |
| por5 [08]             | 194814    | 1620                  | 96.0%             | 51              | 96.5%                           |
| por5 [09]             | 248833    | 1569                  | 96.0%             | 64              | 97.0%                           |
| por5 [10]             | 90099     | 1766                  | 95.8%             | 25              | 95.0%                           |
| por5 [11]             | 153667    | 941                   | 94.8%             | 33              | 96.2%                           |
| por6 [01]             | 61118     | 3228                  | 99.3%             | 37              | 95.0%                           |
| por6 [02]             | 131045    | 2030                  | 97.5%             | 44              | 95.7%                           |
| por6 [03]             | 296157    | 2633                  | 98.5%             | 138             | 96.7%                           |
| por6 [04]             | 109261    | 1975                  | 97.5%             | 35              | 95.7%                           |
| por6 [05]             | 76577     | 3049                  | 99.2%             | 44              | 95.8%                           |
| por6 [06]             | 175930    | 1140                  | 95.4%             | 43              | 93.6%                           |
| por6 [07]             | 201410    | 1811                  | 97.2%             | 60              | 96.4%                           |
| por6 [08]             | 165564    | 1995                  | 97.6%             | 54              | 95.9%                           |
| por6 [09]             | 203007    | 2053                  | 98.0%             | 71              | 96.9%                           |
| por6 [10]             | 224948    | 841                   | 93.6%             | 42              | 96.7%                           |
| por6 [11]             | 196627    | 966                   | 94.3%             | 42              | 96.5%                           |
| por7 [01]             | 278337    | 878                   | 93.6%             | 53              | 96.6%                           |
| por7 [02]             | 478768    | 1092                  | 93.5%             | 80              | 97.0%                           |
| por7 [03]             | 617965    | 1054                  | 91.6%             | 97              | 97.6%                           |
| por7 [04]             | 263686    | 1365                  | 95.2%             | 58              | 96.9%                           |
| por7 [05]             | 245105    | 1358                  | 96.4%             | 68              | 96.4%                           |
| por7 [06]             | 397219    | 759                   | 93.0%             | 67              | 97.1%                           |
| por7 [07]             | 263092    | 1231                  | 95.1%             | 63              | 95.5%                           |
| por7 [08]             | 883226    | 1068                  | 92.1%             | 141             | 97.8%                           |
| por7 [09]             | 264420    | 1953                  | 97.3%             | 84              | 96.8%                           |
| por7 [10]             | 293061    | 1788                  | 96.5%             | 80              | 96.8%                           |
| por7 [11]             | 219224    | 1797                  | 96.1%             | 60              | 96.4%                           |
| por7 [12]             | 175784    | 1886                  | 97.2%             | 53              | 97.0%                           |

**S6 Table****Number of homozygous and heterozygous calls per resistance target across the 17k samples**

| Gene          | Homozygous<br>resistance<br>calls | Heterozygous<br>calls | Heterozygous<br>% |
|---------------|-----------------------------------|-----------------------|-------------------|
| <i>rpoB</i>   | 4905                              | 296                   | 5.7               |
| <i>katG</i>   | 4487                              | 161                   | 3.5               |
| <i>embB</i>   | 3710                              | 269                   | 6.8               |
| <i>pncA</i>   | 2511                              | 436                   | 14.8              |
| <i>rpsL</i>   | 2166                              | 78                    | 3.5               |
| <i>rrs</i>    | 1619                              | 896                   | 35.6              |
| <i>fabG1</i>  | 1368                              | 56                    | 3.9               |
| <i>gyrA</i>   | 1224                              | 296                   | 19.5              |
| <i>ethA</i>   | 970                               | 144                   | 12.9              |
| <i>eis</i>    | 584                               | 73                    | 11.1              |
| <i>embA</i>   | 379                               | 27                    | 6.7               |
| <i>gid</i>    | 372                               | 13                    | 3.4               |
| <i>inhA</i>   | 333                               | 14                    | 4.0               |
| <i>rpoC</i>   | 231                               | 26                    | 10.1              |
| <i>ahpC</i>   | 161                               | 33                    | 17.0              |
| <i>folC</i>   | 139                               | 19                    | 12.0              |
| <i>ethR</i>   | 138                               | 4                     | 2.8               |
| <i>alr</i>    | 124                               | 6                     | 4.6               |
| <i>gyrB</i>   | 96                                | 42                    | 30.4              |
| <i>thyX</i>   | 85                                | 3                     | 3.4               |
| <i>ald</i>    | 58                                | 20                    | 25.6              |
| <i>thyA</i>   | 55                                | 4                     | 6.8               |
| <i>tlyA</i>   | 39                                | 38                    | 49.4              |
| <i>panD</i>   | 10                                | 4                     | 28.6              |
| <i>embC</i>   | 7                                 | 2                     | 22.2              |
| <i>embR</i>   | 6                                 | 0                     | 0.0               |
| <i>Rv0678</i> | 4                                 | 17                    | 81.0              |
| <i>rrl</i>    | 2                                 | 0                     | 0.0               |
| <i>kasA</i>   | 1                                 | 0                     | 0.0               |
| <i>ribD</i>   | 1                                 | 0                     | 0.0               |
| <i>rplC</i>   | 1                                 | 1                     | 50.0              |
| <i>rpsA</i>   | 0                                 | 1                     | 100.0             |

**S7 Table****Predictive performance across different libraries**

| Drug             | No. tests | Susceptible | Resistant | <i>TB Profiler</i><br>Sensitivity | <i>TB Profiler</i><br>Specificity | <i>CRyPTIC*</i><br>Sensitivity | <i>CRyPTIC</i><br>Specificity | <i>Mykrobe**</i><br>Sensitivity | <i>Mykrobe</i><br>Specificity |
|------------------|-----------|-------------|-----------|-----------------------------------|-----------------------------------|--------------------------------|-------------------------------|---------------------------------|-------------------------------|
| Rifampicin       | 17040     | 12473       | 4564      | 95.9%                             | 98.2%                             | 95.9%                          | 97.8%                         | 93.4%                           | 98.4%                         |
| Isoniazid        | 16955     | 11599       | 5295      | 93.7%                             | 98.1%                             | 92.6%                          | 98.4%                         | 90.3%                           | 98.6%                         |
| Ethambutol       | 15334     | 12698       | 2617      | 92.1%                             | 91.7%                             | 87.0%                          | 92.8%                         | 85.5%                           | 93.1%                         |
| Pyrazinamide     | 12381     | 10447       | 1875      | 87.6%                             | 96.7%                             | 76.2%                          | 97.4%                         | 44.9%                           | 98.6%                         |
| Streptomycin     | 5366      | 3992        | 1288      | 78.0%                             | 96.3%                             | -                              | -                             | 75.1%                           | 95.6%                         |
| Ethionamide      | 987       | 649         | 332       | 89.5%                             | 67.4%                             | -                              | -                             | -                               | -                             |
| Amikacin         | 1480      | 1138        | 342       | 86.0%                             | 98.3%                             | -                              | -                             | 79.0%                           | 99.1%                         |
| Capreomycin      | 1783      | 1388        | 393       | 84.7%                             | 95.9%                             | -                              | -                             | 73.3%                           | 94.4%                         |
| Kanamycin        | 1908      | 1252        | 653       | 92.0%                             | 96.8%                             | -                              | -                             | 83.8%                           | 98.7%                         |
| Ciprofloxacin    | 406       | 342         | 64        | 90.6%                             | 98.0%                             | -                              | -                             | -                               | -                             |
| Moxifloxacin     | 905       | 798         | 107       | 86.0%                             | 91.9%                             | -                              | -                             | -                               | -                             |
| Ofloxacin        | 2060      | 1543        | 514       | 90.1%                             | 96.5%                             | -                              | -                             | -                               | -                             |
| Fluoroquinolones | 2532      | 1944        | 539       | 89.1%                             | 97.1%                             | -                              | -                             | 81.4%                           | 97.8%                         |
| PAS              | 418       | 373         | 42        | 23.8%                             | 96.7%                             | -                              | -                             | -                               | -                             |
| Cycloserine      | 402       | 295         | 107       | 43.0%                             | 92.5%                             | -                              | -                             | -                               | -                             |
| MDR-TB           | 16879     | 11293       | 4151      | 94.1%                             | 98.3%                             | 93.4%                          | 98.5%                         | 89.6%                           | 98.5%                         |
| XDR-TB           | 2026      | 1681        | 343       | 83.4%                             | 96.4%                             | -                              | -                             | 65.4%                           | 97.2%                         |

MDR-TB = multi-drug-resistant TB; XDR-TB = extensively-drug-resistant TB; PAS Para-aminosalicylic acid; FQ = Fluoroquinolones; - could not be determined;

\*CRyPTIC library run using *TB Profiler*

\*\**Mykrobe-Profiler TB* (<http://www.mykrobe.com/products/predictor/>) implemented using its command-line version



S1 Figure

Schematic highlighting the main steps in the *TBProfiler* pipeline

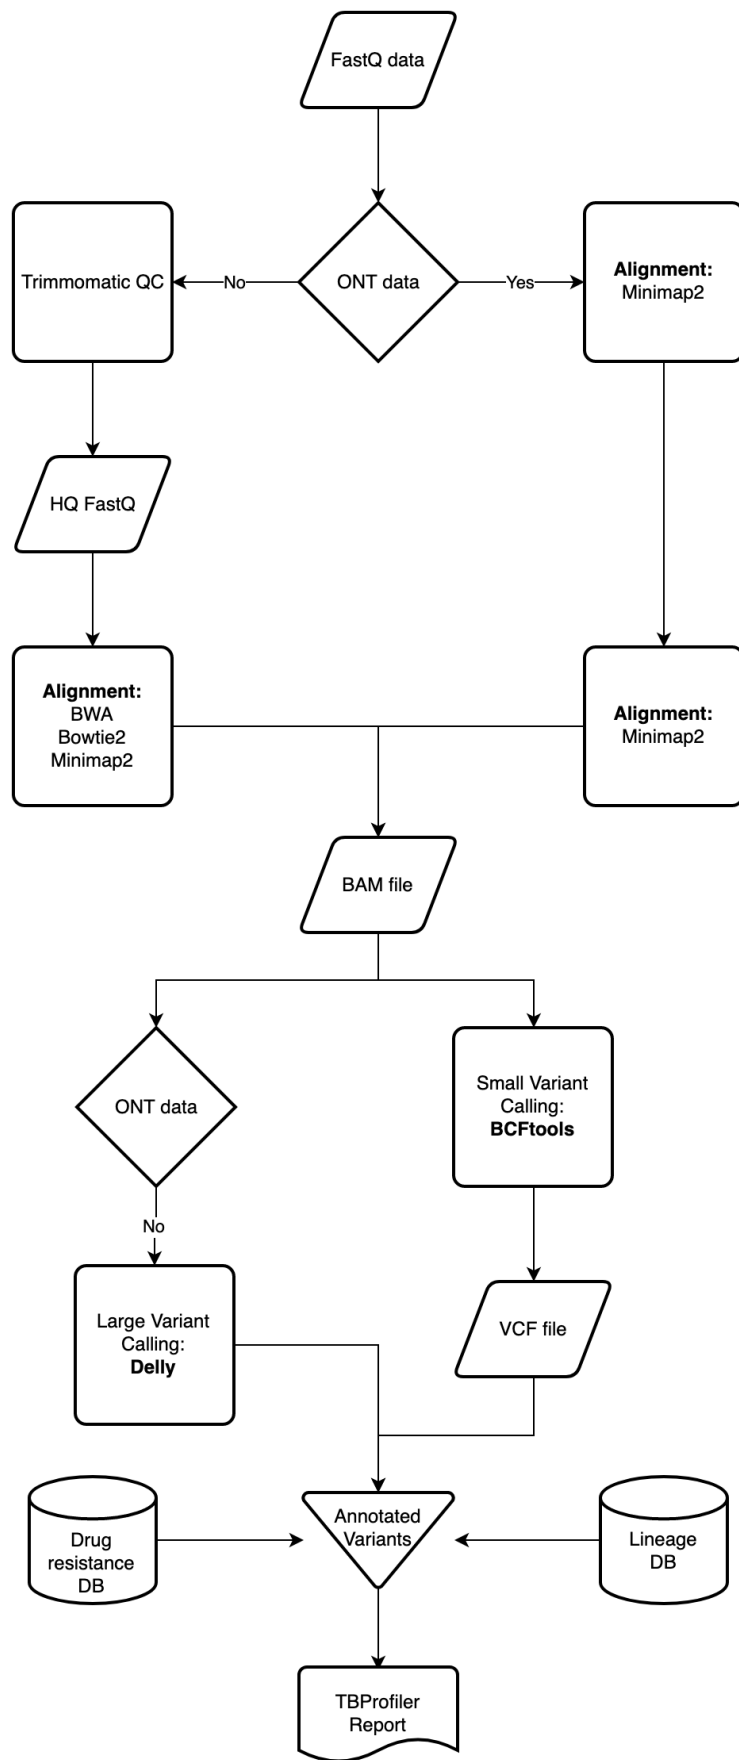

## S2 Figure

Map showing the geographic origin and the resistance types of the 17k isolates used in this study

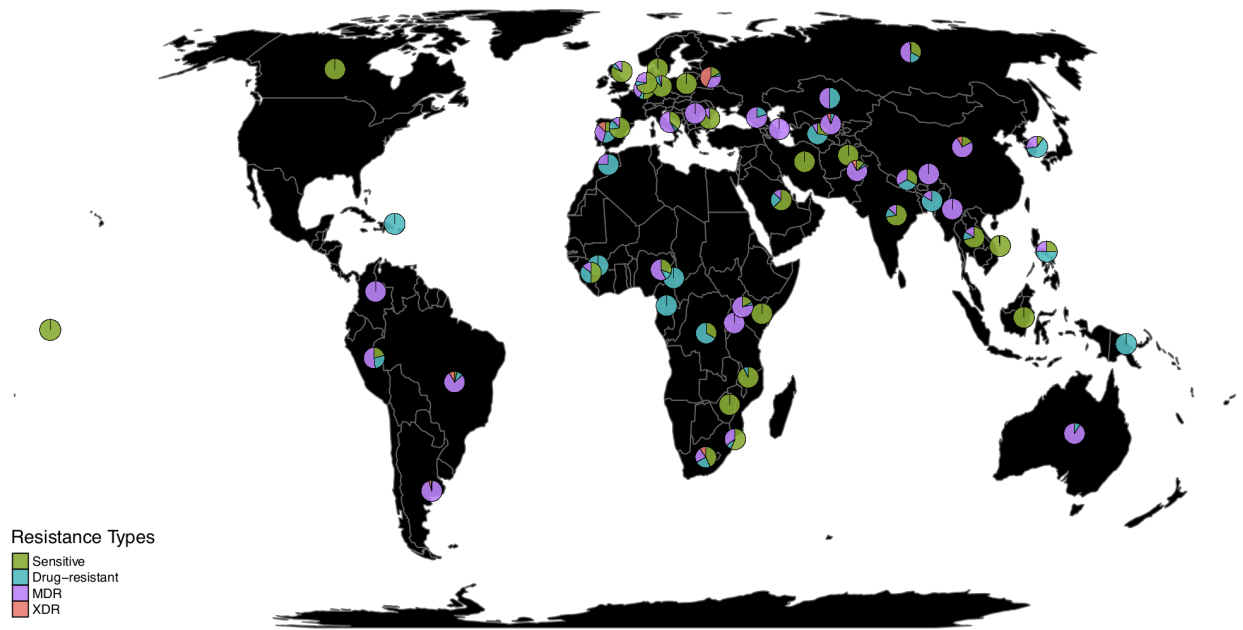

# S3 Figure

## Example of a report (PDF format) for an isolate

### TBProfiler report

The following report has been generated by TBProfiler.

#### Summary

**ID:** tbprofiler  
**Date:** Sat Mar 23 19:50:37 2019  
**Strain:** lineage4.3.3  
**Drug-resistance:** MDR

#### Lineage report

| Lineage      | Estimated Fraction | Family              | Spoilotype  | Rd    |
|--------------|--------------------|---------------------|-------------|-------|
| lineage4     | 1.000              | Euro-American       | LAM:T,S,X,H | None  |
| lineage4.3   | 0.991              | Euro-American (LAM) | mainly-LAM  | None  |
| lineage4.3.3 | 0.996              | Euro-American (LAM) | LAM:T       | RD115 |

#### Resistance report

| Drug                     | Genotypic Resistance | Mutations                                                                     |
|--------------------------|----------------------|-------------------------------------------------------------------------------|
| linezolid                |                      |                                                                               |
| pyrazinamide             | R                    | <i>pncA</i> Chromosome.g.2288682 2288664del (1.00)                            |
| amikacin                 |                      |                                                                               |
| levofloxacin             |                      |                                                                               |
| clofazimine              |                      |                                                                               |
| ciprofloxacin            |                      |                                                                               |
| capreomycin              |                      |                                                                               |
| streptomycin             | R                    | <i>rrs</i> r.908a>g (0.99), <i>gid</i> Chromosome.g.4407912 4408042del (1.00) |
| fluoroquinolones         |                      |                                                                               |
| isoniazid                | R                    | <i>katG</i> p.Ser315Thr (0.98), <i>ahpC</i> r.52c>t (0.99)                    |
| ethambutol               | R                    | <i>embA</i> r.16c>t (0.98), <i>embB</i> p.Gly406Ala (0.99)                    |
| kanamycin                |                      |                                                                               |
| delamanid                |                      |                                                                               |
| rifampicin               | R                    | <i>rpoB</i> p.Ser450Leu (0.98)                                                |
| ethionamide              |                      |                                                                               |
| ofloxacin                |                      |                                                                               |
| para-aminosalicylic acid |                      |                                                                               |
| bedaquiline              |                      |                                                                               |
| moxifloxacin             |                      |                                                                               |
| aminoglycosides          |                      |                                                                               |
| cycloserine              |                      |                                                                               |

#### Other variants report

| Genome Position | Locus Tag | Change      | Estimated Fraction |
|-----------------|-----------|-------------|--------------------|
| 7362            | Rv0006    | p.Glu21Gln  | 1.000              |
| 7585            | Rv0006    | p.Ser95Thr  | 1.000              |
| 8040            | Rv0006    | p.Gly247Ser | 1.000              |
| 9304            | Rv0006    | p.Gly668Asp | 1.000              |
| 761547          | Rv0667    | p.Val581Met | 1.000              |
| 764995          | Rv0668    | c.1626C>G   | 0.994              |
| 781395          | Rv0682    | r.165a>c    | 1.000              |
| 1476056         | rrf1      | r.2399g>a   | 0.986              |
| 1917972         | Rv1694    | c.33A>G     | 1.000              |
| 2518919         | Rv2245    | p.Gly269Ser | 0.988              |
| 2715267         | Rv2416c   | c.20 G5del  | 0.330              |
| 3073868         | Rv2764c   | p.Thr202Ala | 1.000              |
| 3086788         | Rv2780    | r.32t>c     | 1.000              |
| 4242643         | Rv3793    | c.2781C>T   | 1.000              |
| 4327484         | Rv3855    | r.65c>c     | 1.000              |
| 4408156         | Rv3919c   | p.Leu16Arg  | 0.977              |

#### Analysis pipeline specifications

Version: 2.0

| Analysis        | Program  |
|-----------------|----------|
| Mapping         | N/A      |
| Variant Calling | BCFtools |

#### Disclaimer

This tool is for **Research Use Only** and is offered free for use. The London School of Hygiene and Tropical Medicine shall have no liability for any loss or damages of any kind, however sustained relating to the use of this tool.

#### Citation

Coll, F. *et al.* Rapid determination of anti-tuberculosis drug resistance from whole-genome sequences. *Genome Medicine* 7, 51. 2015
