# Supplementary material for: Integrating informatics tools and portable sequencing technology for rapid detection of resistance to anti-tuberculous drugs
Source: Genome Med. 2019 Jun 24;11:41. doi: 10.1186/s13073-019-0650-x (PMC6591855; doi:10.1186/s13073-019-0650-x)
Supplement: Supplementary file 1 — Data S1. Mutations in the library (CSV 51 kb) [file 13073_2019_650_MOESM1_ESM.csv]

Gene	Mutation	Drug	Observed in 17k samples with WGS
rrs	r.1158g>t	amikacin	No
rrs	r.1338a>c	amikacin	Yes
rrs	r.1401a>g	amikacin	Yes
rrs	r.1402c>a	amikacin	Yes
rrs	r.1402c>t	amikacin	Yes
rrs	r.1484g>t	amikacin	Yes
rrs	r.1158g>t	aminoglycosides	No
rrs	r.1338a>c	aminoglycosides	Yes
rrs	r.1401a>g	aminoglycosides	Yes
rrs	r.1402c>a	aminoglycosides	Yes
rrs	r.1402c>t	aminoglycosides	Yes
rrs	r.1484g>t	aminoglycosides	Yes
Rv0678	c.192_193insG	bedaquiline	No
Rv0678	c.38_39insA	bedaquiline	No
Rv0678	p.Arg134*	bedaquiline	No
Rv0678	p.Arg94Gln	bedaquiline	No
Rv0678	p.Glu138Gly	bedaquiline	No
Rv0678	p.Ser63Arg	bedaquiline	No
Rv0678	p.Ser68Gly	bedaquiline	No
rrs	r.1401a>g	capreomycin	Yes
rrs	r.1402c>a	capreomycin	Yes
rrs	r.1402c>t	capreomycin	Yes
rrs	r.1484g>t	capreomycin	Yes
tlyA	c.198_199insGC	capreomycin	No
tlyA	c.23del	capreomycin	No
tlyA	c.26del	capreomycin	No
tlyA	c.310del	capreomycin	No
tlyA	c.400del	capreomycin	No
tlyA	c.477del	capreomycin	No
tlyA	c.586del	capreomycin	No
tlyA	c.653del	capreomycin	No
tlyA	c.673_674del	capreomycin	No
tlyA	c.67_69del	capreomycin	No
tlyA	c.733_742del	capreomycin	No
tlyA	c.751_752insTG	capreomycin	No
tlyA	c.758del	capreomycin	No
tlyA	frameshift	capreomycin	No
tlyA	p.Ala67Glu	capreomycin	No
tlyA	p.Ala91Glu	capreomycin	No
tlyA	p.Arg14Trp	capreomycin	No
tlyA	p.Arg18*	capreomycin	No
tlyA	p.Arg3*	capreomycin	No
tlyA	p.Asn236Lys	capreomycin	Yes
tlyA	p.Gln184*	capreomycin	No
tlyA	p.Gln22*	capreomycin	No
tlyA	p.Glu238Lys	capreomycin	No
tlyA	p.Leu118Pro	capreomycin	No
tlyA	p.Leu150Pro	capreomycin	No
tlyA	p.Lys69Glu	capreomycin	No
tlyA	p.Phe185Leu	capreomycin	No
tlyA	p.Pro183Leu	capreomycin	No
tlyA	p.Val128Glu	capreomycin	No
gyrA	p.Ala74Ser	ciprofloxacin	Yes
gyrA	p.Ala90Glu	ciprofloxacin	Yes
gyrA	p.Ala90Gly	ciprofloxacin	Yes
gyrA	p.Ala90Val	ciprofloxacin	Yes
gyrA	p.Arg68Gly	ciprofloxacin	No
gyrA	p.Asp89Asn	ciprofloxacin	Yes
gyrA	p.Asp94Ala	ciprofloxacin	Yes
gyrA	p.Asp94Asn	ciprofloxacin	Yes
gyrA	p.Asp94Gly	ciprofloxacin	Yes
gyrA	p.Asp94His	ciprofloxacin	Yes
gyrA	p.Asp94Tyr	ciprofloxacin	Yes
gyrA	p.Asp94Val	ciprofloxacin	Yes
gyrA	p.Gly88Ala	ciprofloxacin	Yes
gyrA	p.Gly88Cys	ciprofloxacin	Yes
gyrA	p.His70Arg	ciprofloxacin	Yes
gyrA	p.Ile92Met	ciprofloxacin	No
gyrA	p.Leu109Val	ciprofloxacin	No
gyrA	p.Pro102His	ciprofloxacin	Yes
gyrA	p.Ser69Thr	ciprofloxacin	No
gyrA	p.Ser91Ala	ciprofloxacin	Yes
gyrA	p.Ser91Pro	ciprofloxacin	Yes
gyrB	p.Ala504Thr	ciprofloxacin	Yes
gyrB	p.Ala504Val	ciprofloxacin	Yes
gyrB	p.Ala90Gly	ciprofloxacin	No
gyrB	p.Arg446Cys	ciprofloxacin	Yes
gyrB	p.Arg446His	ciprofloxacin	Yes
gyrB	p.Arg446Leu	ciprofloxacin	No
gyrB	p.Asn499Asp	ciprofloxacin	Yes
gyrB	p.Asn499Lys	ciprofloxacin	Yes
gyrB	p.Asn499Thr	ciprofloxacin	Yes
gyrB	p.Asn499Tyr	ciprofloxacin	Yes
gyrB	p.Asp461Ala	ciprofloxacin	Yes
gyrB	p.Asp461Asn	ciprofloxacin	Yes
gyrB	p.Asp461His	ciprofloxacin	Yes
gyrB	p.Asp494Ala	ciprofloxacin	Yes
gyrB	p.Gln538His	ciprofloxacin	No
gyrB	p.Glu501Asp	ciprofloxacin	Yes
gyrB	p.Glu501Val	ciprofloxacin	Yes
gyrB	p.Gly470Ala	ciprofloxacin	No
gyrB	p.Gly470Cys	ciprofloxacin	No
gyrB	p.Ile486Leu	ciprofloxacin	Yes
gyrB	p.Ser447Phe	ciprofloxacin	Yes
gyrB	p.Thr500Asn	ciprofloxacin	Yes
gyrB	p.Thr500Ile	ciprofloxacin	Yes
gyrB	p.Thr500Pro	ciprofloxacin	Yes
gyrB	p.Thr507Met	ciprofloxacin	No
gyrB	p.Val670Phe	ciprofloxacin	Yes
Rv0678	c.192_193insG	clofazimine	No
Rv0678	c.38_39insA	clofazimine	No
Rv0678	p.Arg134*	clofazimine	No
Rv0678	p.Arg94Gln	clofazimine	No
Rv0678	p.Glu138Gly	clofazimine	No
Rv0678	p.Ser63Arg	clofazimine	No
Rv0678	p.Ser68Gly	clofazimine	No
ald	c.1106_1107insG	cycloserine	No
ald	c.128_129insG	cycloserine	No
ald	c.133_134insTC	cycloserine	No
ald	c.133del	cycloserine	No
ald	c.317_318insT	cycloserine	No
ald	c.433_434insGC	cycloserine	No
ald	c.460del	cycloserine	No
ald	c.837_838insCCGAC	cycloserine	No
ald	c.877_878insCG	cycloserine	No
ald	c.896_897insGA	cycloserine	No
ald	c.966_967insGA	cycloserine	No
ald	c.991_992insC	cycloserine	No
alr	p.Leu113Arg	cycloserine	Yes
alr	p.Met343Thr	cycloserine	Yes
alr	p.Phe4Leu	cycloserine	Yes
Rv3261	p.Asp49Tyr	delamanid	No
embA	c.-11C>A	ethambutol	Yes
embA	c.-12C>T	ethambutol	Yes
embA	c.-16C>G	ethambutol	Yes
embA	c.-16C>T	ethambutol	Yes
embA	c.-26del	ethambutol	No
embA	c.-28del	ethambutol	No
embA	c.-29_-28del	ethambutol	No
embA	c.-32del	ethambutol	No
embA	c.-34del	ethambutol	No
embA	c.-37del	ethambutol	No
embA	p.Ala462Val	ethambutol	No
embA	p.Asp4Asn	ethambutol	Yes
embA	p.Asp833Ala	ethambutol	No
embA	p.Gly321Ser	ethambutol	No
embA	p.Gly350Asp	ethambutol	No
embB	c.983del	ethambutol	No
embB	p.Ala221Gly	ethambutol	No
embB	p.Ala225Ser	ethambutol	No
embB	p.Ala271Val	ethambutol	No
embB	p.Ala281Pro	ethambutol	No
embB	p.Ala313Val	ethambutol	Yes
embB	p.Ala356Ser	ethambutol	No
embB	p.Ala356Val	ethambutol	Yes
embB	p.Ala357Ser	ethambutol	No
embB	p.Ala357Val	ethambutol	No
embB	p.Ala379Asp	ethambutol	No
embB	p.Ala379Thr	ethambutol	Yes
embB	p.Ala388Gly	ethambutol	Yes
embB	p.Ala431Thr	ethambutol	Yes
embB	p.Ala659Thr	ethambutol	Yes
embB	p.Arg257Trp	ethambutol	No
embB	p.Arg274Pro	ethambutol	No
embB	p.Arg367Pro	ethambutol	No
embB	p.Arg460Cys	ethambutol	No
embB	p.Arg460Leu	ethambutol	Yes
embB	p.Arg469Pro	ethambutol	No
embB	p.Arg471Pro	ethambutol	No
embB	p.Arg507Lys	ethambutol	No
embB	p.Asn296His	ethambutol	Yes
embB	p.Asn296Lys	ethambutol	No
embB	p.Asn318His	ethambutol	No
embB	p.Asn318Lys	ethambutol	No
embB	p.Asn318Ser	ethambutol	No
embB	p.Asn399Asp	ethambutol	Yes
embB	p.Asn399His	ethambutol	No
embB	p.Asn400Lys	ethambutol	No
embB	p.Asp1024Asn	ethambutol	Yes
embB	p.Asp240His	ethambutol	No
embB	p.Asp299Glu	ethambutol	No
embB	p.Asp311Gly	ethambutol	No
embB	p.Asp311His	ethambutol	No
embB	p.Asp328Gly	ethambutol	Yes
embB	p.Asp328Tyr	ethambutol	Yes
embB	p.Asp328Val	ethambutol	No
embB	p.Asp354Ala	ethambutol	Yes
embB	p.Asp959Ala	ethambutol	No
embB	p.Gln497Arg	ethambutol	Yes
embB	p.Gln497Lys	ethambutol	Yes
embB	p.Gln497Pro	ethambutol	Yes
embB	p.Gln853Pro	ethambutol	Yes
embB	p.Glu368Ala	ethambutol	No
embB	p.Glu368Asp	ethambutol	Yes
embB	p.Glu368Gln	ethambutol	No
embB	p.Glu378Lys	ethambutol	No
embB	p.Glu405Asp	ethambutol	Yes
embB	p.Glu504Asp	ethambutol	Yes
embB	p.Gly294Ser	ethambutol	No
embB	p.Gly314Ala	ethambutol	No
embB	p.Gly331Arg	ethambutol	No
embB	p.Gly358Val	ethambutol	No
embB	p.Gly374Val	ethambutol	No
embB	p.Gly401Ser	ethambutol	No
embB	p.Gly406Ala	ethambutol	Yes
embB	p.Gly406Asp	ethambutol	Yes
embB	p.Gly406Cys	ethambutol	Yes
embB	p.Gly406Ser	ethambutol	Yes
embB	p.Gly448Val	ethambutol	No
embB	p.Gly459Ala	ethambutol	No
embB	p.Gly745Asp	ethambutol	No
embB	p.His1002Arg	ethambutol	Yes
embB	p.His312Arg	ethambutol	Yes
embB	p.Ile293Asn	ethambutol	No
embB	p.Leu239Pro	ethambutol	No
embB	p.Leu359Ile	ethambutol	Yes
embB	p.Leu370Arg	ethambutol	Yes
embB	p.Met1000Arg	ethambutol	Yes
embB	p.Met306Ile	ethambutol	Yes
embB	p.Met306Leu	ethambutol	Yes
embB	p.Met306Thr	ethambutol	Yes
embB	p.Met306Val	ethambutol	Yes
embB	p.Met423Ile	ethambutol	Yes
embB	p.Met423Thr	ethambutol	Yes
embB	p.Met482Ile	ethambutol	No
embB	p.Phe285Leu	ethambutol	Yes
embB	p.Phe287Cys	ethambutol	No
embB	p.Phe287Val	ethambutol	No
embB	p.Phe320Leu	ethambutol	No
embB	p.Phe330Val	ethambutol	Yes
embB	p.Phe398Tyr	ethambutol	No
embB	p.Pro371Arg	ethambutol	Yes
embB	p.Pro375Ala	ethambutol	No
embB	p.Pro397Gln	ethambutol	Yes
embB	p.Pro397Thr	ethambutol	Yes
embB	p.Pro404Ser	ethambutol	Yes
embB	p.Pro430Leu	ethambutol	Yes
embB	p.Pro446His	ethambutol	No
embB	p.Pro461Ser	ethambutol	No
embB	p.Ser272Cys	ethambutol	No
embB	p.Ser272Ile	ethambutol	No
embB	p.Ser297Ala	ethambutol	Yes
embB	p.Ser297Leu	ethambutol	No
embB	p.Ser298Trp	ethambutol	No
embB	p.Ser317Thr	ethambutol	No
embB	p.Ser347Cys	ethambutol	No
embB	p.Ser347Ile	ethambutol	Yes
embB	p.Ser347Thr	ethambutol	Yes
embB	p.Ser366Pro	ethambutol	No
embB	p.Ser380Arg	ethambutol	No
embB	p.Ser380Asn	ethambutol	No
embB	p.Ser412Leu	ethambutol	No
embB	p.Thr437Ala	ethambutol	No
embB	p.Trp332Leu	ethambutol	No
embB	p.Trp395Arg	ethambutol	No
embB	p.Trp395Cys	ethambutol	No
embB	p.Tyr315Cys	ethambutol	No
embB	p.Tyr319Asn	ethambutol	No
embB	p.Tyr319Cys	ethambutol	Yes
embB	p.Tyr319Ser	ethambutol	Yes
embB	p.Tyr333His	ethambutol	No
embB	p.Tyr334His	ethambutol	Yes
embB	p.Tyr384Asn	ethambutol	Yes
embB	p.Val227Gly	ethambutol	No
embB	p.Val282Gly	ethambutol	No
embB	p.Val282Leu	ethambutol	No
embB	p.Val309Gly	ethambutol	No
embB	p.Val360Met	ethambutol	No
embB	p.Val369Ala	ethambutol	No
embB	p.Val369Leu	ethambutol	No
embB	p.Val377Gly	ethambutol	No
embB	p.Val377Met	ethambutol	No
embB	p.Val435Gly	ethambutol	No
embB	p.Val436Gly	ethambutol	No
embB	p.Val452Leu	ethambutol	Yes
embC	p.Ala244Thr	ethambutol	No
embC	p.Ala247Pro	ethambutol	No
embC	p.Ala254Gly	ethambutol	No
embC	p.Ala307Thr	ethambutol	Yes
embC	p.Ala779Val	ethambutol	Yes
embC	p.Arg302Gly	ethambutol	No
embC	p.Glu187Glu	ethambutol	No
embC	p.Gly272Ser	ethambutol	No
embC	p.Gly288Trp	ethambutol	Yes
embC	p.Gly288Val	ethambutol	No
embC	p.Gly308Asp	ethambutol	No
embC	p.Gly325Ser	ethambutol	No
embC	p.His285Tyr	ethambutol	No
embC	p.Ile297Leu	ethambutol	No
embC	p.Ile297Thr	ethambutol	No
embC	p.Leu251Arg	ethambutol	Yes
embC	p.Met300Arg	ethambutol	No
embC	p.Met310Lys	ethambutol	No
embC	p.Trp326Arg	ethambutol	No
embC	p.Tyr296His	ethambutol	No
embC	p.Tyr296Ser	ethambutol	No
embC	p.Tyr309Asn	ethambutol	No
embC	p.Tyr327Asn	ethambutol	No
embC	p.Val287Phe	ethambutol	No
embC	p.Val303Gly	ethambutol	No
embR	p.Ala176Val	ethambutol	No
embR	p.Ala187Val	ethambutol	No
embR	p.Arg186Gly	ethambutol	No
embR	p.Arg230Trp	ethambutol	No
embR	p.Arg356Gly	ethambutol	No
embR	p.Asp223Glu	ethambutol	No
embR	p.Asp53His	ethambutol	No
embR	p.Gln379Arg	ethambutol	Yes
embR	p.Glu200Ala	ethambutol	No
embR	p.Gly240Arg	ethambutol	No
embR	p.Ile369Thr	ethambutol	No
embR	p.Leu172Arg	ethambutol	Yes
embR	p.Leu211Met	ethambutol	No
embR	p.Leu292Met	ethambutol	No
embR	p.Leu320Val	ethambutol	No
embR	p.Ser188Arg	ethambutol	No
embR	p.Ser326Asn	ethambutol	No
embR	p.Thr32Pro	ethambutol	No
embR	p.Val350Gly	ethambutol	No
embR	p.Val7Gly	ethambutol	Yes
ethA	c.101del	ethionamide	No
ethA	c.1023_1024insGC	ethionamide	No
ethA	c.1047del	ethionamide	No
ethA	c.1054del	ethionamide	No
ethA	c.1057_1059del	ethionamide	Yes
ethA	c.1080del	ethionamide	No
ethA	c.1104del	ethionamide	No
ethA	c.110del	ethionamide	No
ethA	c.1164_1165insA	ethionamide	No
ethA	c.119_120insA	ethionamide	No
ethA	c.1194_1195insT	ethionamide	No
ethA	c.1195_1196insGTG	ethionamide	No
ethA	c.-11A>G	ethionamide	Yes
ethA	c.1215_1224del	ethionamide	Yes
ethA	c.1242del	ethionamide	No
ethA	c.1290del	ethionamide	No
ethA	c.1304_1305insA	ethionamide	No
ethA	c.130del	ethionamide	No
ethA	c.1322_1323del	ethionamide	No
ethA	c.1406_1407insC	ethionamide	No
ethA	c.140del	ethionamide	No
ethA	c.1465del	ethionamide	No
ethA	c.180del	ethionamide	No
ethA	c.229del	ethionamide	No
ethA	c.308del	ethionamide	No
ethA	c.492_493insCC	ethionamide	No
ethA	c.597del	ethionamide	No
ethA	c.621_622insG	ethionamide	No
ethA	c.639_640del	ethionamide	Yes
ethA	c.673_674insG	ethionamide	No
ethA	c.674_675insGC	ethionamide	No
ethA	c.701_702insGG	ethionamide	No
ethA	c.703del	ethionamide	No
ethA	c.753_754insG	ethionamide	No
ethA	c.756_757insGC	ethionamide	No
ethA	c.768del	ethionamide	No
ethA	c.771_772insC	ethionamide	No
ethA	c.774del	ethionamide	No
ethA	c.785_787del	ethionamide	Yes
ethA	c.852_853insC	ethionamide	No
ethA	c.870_871insA	ethionamide	No
ethA	c.884del	ethionamide	No
ethA	c.896del	ethionamide	No
ethA	frameshift	ethionamide	No
ethA	large_deletion	ethionamide	No
ethA	p.Ala381Pro	ethionamide	Yes
ethA	p.Arg463Ser	ethionamide	No
ethA	p.Asp58Ala	ethionamide	Yes
ethA	p.Cys403Gly	ethionamide	No
ethA	p.Gln165Pro	ethionamide	Yes
ethA	p.Gln246*	ethionamide	No
ethA	p.Gln269*	ethionamide	No
ethA	p.Gln347*	ethionamide	No
ethA	p.Glu223Lys	ethionamide	Yes
ethA	p.Gly11Ala	ethionamide	No
ethA	p.Gly385Asp	ethionamide	Yes
ethA	p.Gly413Asp	ethionamide	Yes
ethA	p.Gly43Cys	ethionamide	Yes
ethA	p.Gly43Ser	ethionamide	Yes
ethA	p.His22Pro	ethionamide	Yes
ethA	p.Ile338Ser	ethionamide	Yes
ethA	p.Leu272Pro	ethionamide	Yes
ethA	p.Leu333Arg	ethionamide	No
ethA	p.Leu397Arg	ethionamide	Yes
ethA	p.Met1Arg	ethionamide	Yes
ethA	p.Pro51Leu	ethionamide	Yes
ethA	p.Ser329Leu	ethionamide	No
ethA	p.Thr186Lys	ethionamide	No
ethA	p.Thr232Ala	ethionamide	Yes
ethA	p.Thr342Lys	ethionamide	Yes
ethA	p.Thr392Ala	ethionamide	Yes
ethA	p.Thr61Met	ethionamide	Yes
ethA	p.Tyr386Cys	ethionamide	Yes
ethA	p.Tyr461His	ethionamide	No
ethA	p.Tyr84Asp	ethionamide	Yes
ethR	p.Ala95Thr	ethionamide	Yes
ethR	p.Phe110Leu	ethionamide	Yes
fabG1	c.-15C>T	ethionamide	Yes
fabG1	c.-17G>T	ethionamide	Yes
fabG1	c.-8T>C	ethionamide	Yes
inhA	p.Ile194Thr	ethionamide	Yes
inhA	p.Ile21Thr	ethionamide	Yes
inhA	p.Ser94Ala	ethionamide	Yes
gyrA	p.Ala74Ser	fluoroquinolones	Yes
gyrA	p.Ala90Glu	fluoroquinolones	Yes
gyrA	p.Ala90Gly	fluoroquinolones	Yes
gyrA	p.Ala90Val	fluoroquinolones	Yes
gyrA	p.Arg68Gly	fluoroquinolones	No
gyrA	p.Asp89Asn	fluoroquinolones	Yes
gyrA	p.Asp94Ala	fluoroquinolones	Yes
gyrA	p.Asp94Asn	fluoroquinolones	Yes
gyrA	p.Asp94Gly	fluoroquinolones	Yes
gyrA	p.Asp94His	fluoroquinolones	Yes
gyrA	p.Asp94Tyr	fluoroquinolones	Yes
gyrA	p.Asp94Val	fluoroquinolones	Yes
gyrA	p.Gly88Ala	fluoroquinolones	Yes
gyrA	p.Gly88Cys	fluoroquinolones	Yes
gyrA	p.His70Arg	fluoroquinolones	Yes
gyrA	p.Ile92Met	fluoroquinolones	No
gyrA	p.Leu109Val	fluoroquinolones	No
gyrA	p.Pro102His	fluoroquinolones	Yes
gyrA	p.Ser69Thr	fluoroquinolones	No
gyrA	p.Ser91Ala	fluoroquinolones	Yes
gyrA	p.Ser91Pro	fluoroquinolones	Yes
gyrB	p.Ala504Thr	fluoroquinolones	Yes
gyrB	p.Ala504Val	fluoroquinolones	Yes
gyrB	p.Ala90Gly	fluoroquinolones	No
gyrB	p.Arg446Cys	fluoroquinolones	Yes
gyrB	p.Arg446His	fluoroquinolones	Yes
gyrB	p.Arg446Leu	fluoroquinolones	No
gyrB	p.Asn499Asp	fluoroquinolones	Yes
gyrB	p.Asn499Lys	fluoroquinolones	Yes
gyrB	p.Asn499Thr	fluoroquinolones	Yes
gyrB	p.Asn499Tyr	fluoroquinolones	Yes
gyrB	p.Asp461Ala	fluoroquinolones	Yes
gyrB	p.Asp461Asn	fluoroquinolones	Yes
gyrB	p.Asp461His	fluoroquinolones	Yes
gyrB	p.Asp494Ala	fluoroquinolones	Yes
gyrB	p.Gln538His	fluoroquinolones	No
gyrB	p.Glu501Asp	fluoroquinolones	Yes
gyrB	p.Glu501Val	fluoroquinolones	Yes
gyrB	p.Gly470Ala	fluoroquinolones	No
gyrB	p.Gly470Cys	fluoroquinolones	No
gyrB	p.Ile486Leu	fluoroquinolones	Yes
gyrB	p.Ser447Phe	fluoroquinolones	Yes
gyrB	p.Thr500Asn	fluoroquinolones	Yes
gyrB	p.Thr500Ile	fluoroquinolones	Yes
gyrB	p.Thr500Pro	fluoroquinolones	Yes
gyrB	p.Thr507Met	fluoroquinolones	No
gyrB	p.Val670Phe	fluoroquinolones	Yes
ahpC	c.-20C>T	isoniazid	No
ahpC	c.-39C>T	isoniazid	Yes
ahpC	c.-44T>A	isoniazid	No
ahpC	c.-48G>A	isoniazid	Yes
ahpC	c.-48G>T	isoniazid	No
ahpC	c.-49T>G	isoniazid	No
ahpC	c.-4A>G	isoniazid	No
ahpC	c.-51G>T	isoniazid	No
ahpC	c.-52C>T	isoniazid	Yes
ahpC	c.-54C>T	isoniazid	Yes
ahpC	c.-5G>A	isoniazid	No
ahpC	c.-66G>A	isoniazid	No
ahpC	c.-74G>A	isoniazid	Yes
ahpC	c.-81C>T	isoniazid	Yes
ahpC	p.Asp33Asn	isoniazid	No
ahpC	p.Asp73His	isoniazid	Yes
ahpC	p.Glu76Lys	isoniazid	Yes
ahpC	p.Leu191Arg	isoniazid	Yes
ahpC	p.Phe10Ile	isoniazid	No
ahpC	p.Pro2Ser	isoniazid	Yes
ahpC	p.Thr5Ile	isoniazid	No
fabG1	c.-11A>T	isoniazid	No
fabG1	c.-15C>T	isoniazid	Yes
fabG1	c.-16A>G	isoniazid	No
fabG1	c.-17G>T	isoniazid	Yes
fabG1	c.-24G>T	isoniazid	No
fabG1	c.-5T>A	isoniazid	No
fabG1	c.-67G>C	isoniazid	No
fabG1	c.-8T>A	isoniazid	Yes
fabG1	c.-8T>C	isoniazid	Yes
fabG1	c.-8T>G	isoniazid	Yes
fabG1	c.-92A>T	isoniazid	No
inhA	p.Gly40Trp	isoniazid	Yes
inhA	p.Ile16Thr	isoniazid	Yes
inhA	p.Ile194Thr	isoniazid	Yes
inhA	p.Ile21Asn	isoniazid	No
inhA	p.Ile21Thr	isoniazid	Yes
inhA	p.Ile21Val	isoniazid	Yes
inhA	p.Ile47Thr	isoniazid	No
inhA	p.Ile95Thr	isoniazid	No
inhA	p.Leu11Val	isoniazid	No
inhA	p.Lys8Asn	isoniazid	No
inhA	p.Ser94Ala	isoniazid	Yes
inhA	p.Ser94Leu	isoniazid	No
inhA	p.Ser94Trp	isoniazid	No
kasA	p.Arg121Lys	isoniazid	No
kasA	p.Asp66Asn	isoniazid	No
kasA	p.Gly387Asp	isoniazid	Yes
kasA	p.Met77Ile	isoniazid	No
katG	c.1037del	isoniazid	No
katG	c.1091del	isoniazid	No
katG	c.109del	isoniazid	No
katG	c.-10A>C	isoniazid	Yes
katG	c.1171_1172insCTA	isoniazid	No
katG	c.1203del	isoniazid	No
katG	c.-12G>A	isoniazid	No
katG	c.1330_1331insA	isoniazid	No
katG	c.1339_1350del	isoniazid	Yes
katG	c.149del	isoniazid	No
katG	c.152_166del	isoniazid	No
katG	c.1560_1561insTGCAGCCACAAGTCGGGTGGGAGGTCAACGACCCCGACGGGGATCTGCGCAAGGTCATTCGCAC	isoniazid	No
katG	c.1612_1613insA	isoniazid	No
katG	c.1667del	isoniazid	No
katG	c.1804_1810del	isoniazid	Yes
katG	c.1850_1851insAC	isoniazid	No
katG	c.186_187insC	isoniazid	No
katG	c.1901_1902insC	isoniazid	No
katG	c.196_197insCCCC	isoniazid	No
katG	c.2203_2205del	isoniazid	No
katG	c.269_270insT	isoniazid	No
katG	c.28_35del	isoniazid	No
katG	c.317_318insG	isoniazid	No
katG	c.358_369del	isoniazid	No
katG	c.372_373del	isoniazid	Yes
katG	c.373_374insG	isoniazid	No
katG	c.374_375insCAT	isoniazid	No
katG	c.54del	isoniazid	No
katG	c.561del	isoniazid	No
katG	c.572del	isoniazid	No
katG	c.6_7del	isoniazid	No
katG	c.795del	isoniazid	No
katG	c.-7G>A	isoniazid	No
katG	c.803del	isoniazid	No
katG	c.861_866del	isoniazid	Yes
katG	c.86_88del	isoniazid	Yes
katG	c.902_903insT	isoniazid	No
katG	c.928del	isoniazid	No
katG	c.956del	isoniazid	No
katG	c.99_100insA	isoniazid	No
katG	frameshift	isoniazid	No
katG	large_deletion	isoniazid	No
katG	p.Ala106Val	isoniazid	Yes
katG	p.Ala109Val	isoniazid	Yes
katG	p.Ala110Val	isoniazid	Yes
katG	p.Ala139Pro	isoniazid	Yes
katG	p.Ala162Thr	isoniazid	No
katG	p.Ala172Thr	isoniazid	No
katG	p.Ala172Val	isoniazid	Yes
katG	p.Ala243Ser	isoniazid	No
katG	p.Ala264Thr	isoniazid	Yes
katG	p.Ala281Val	isoniazid	No
katG	p.Ala291Pro	isoniazid	No
katG	p.Ala350Ser	isoniazid	No
katG	p.Ala350Thr	isoniazid	No
katG	p.Ala361Asp	isoniazid	No
katG	p.Ala379Val	isoniazid	Yes
katG	p.Ala409Asp	isoniazid	No
katG	p.Ala424Glu	isoniazid	No
katG	p.Ala424Gly	isoniazid	Yes
katG	p.Ala424Val	isoniazid	No
katG	p.Ala444Thr	isoniazid	No
katG	p.Ala464Ser	isoniazid	No
katG	p.Ala550Asp	isoniazid	Yes
katG	p.Ala551Gly	isoniazid	No
katG	p.Ala574Glu	isoniazid	No
katG	p.Ala574Val	isoniazid	No
katG	p.Ala61Thr	isoniazid	No
katG	p.Ala636Glu	isoniazid	No
katG	p.Ala65Thr	isoniazid	Yes
katG	p.Ala66Pro	isoniazid	No
katG	p.Ala713Pro	isoniazid	No
katG	p.Ala716Pro	isoniazid	No
katG	p.Ala727Asp	isoniazid	No
katG	p.Arg104Gln	isoniazid	Yes
katG	p.Arg104Leu	isoniazid	No
katG	p.Arg128Pro	isoniazid	No
katG	p.Arg249Cys	isoniazid	Yes
katG	p.Arg418Gln	isoniazid	No
katG	p.Arg418Leu	isoniazid	No
katG	p.Arg463Trp	isoniazid	No
katG	p.Arg484Ser	isoniazid	Yes
katG	p.Arg496Leu	isoniazid	Yes
katG	p.Arg515Cys	isoniazid	No
katG	p.Asn138Asp	isoniazid	Yes
katG	p.Asn138His	isoniazid	Yes
katG	p.Asn138Ser	isoniazid	Yes
katG	p.Asn138Thr	isoniazid	No
katG	p.Asn218Lys	isoniazid	No
katG	p.Asn236Thr	isoniazid	No
katG	p.Asn238Lys	isoniazid	No
katG	p.Asn258Ser	isoniazid	No
katG	p.Asn35Asp	isoniazid	No
katG	p.Asn529Asp	isoniazid	No
katG	p.Asp117Ala	isoniazid	Yes
katG	p.Asp142Ala	isoniazid	No
katG	p.Asp259Glu	isoniazid	Yes
katG	p.Asp311Glu	isoniazid	No
katG	p.Asp311Gly	isoniazid	No
katG	p.Asp311Tyr	isoniazid	No
katG	p.Asp357Asn	isoniazid	No
katG	p.Asp357His	isoniazid	No
katG	p.Asp381Gly	isoniazid	No
katG	p.Asp419His	isoniazid	Yes
katG	p.Asp573Asn	isoniazid	No
katG	p.Asp63Glu	isoniazid	No
katG	p.Asp695Ala	isoniazid	Yes
katG	p.Asp72Gly	isoniazid	No
katG	p.Asp735Ala	isoniazid	No
katG	p.Asp735Asn	isoniazid	No
katG	p.Asp74Gly	isoniazid	No
katG	p.Asp74Tyr	isoniazid	No
katG	p.Asp94Ala	isoniazid	No
katG	p.Asp94Gly	isoniazid	No
katG	p.Gln127Pro	isoniazid	Yes
katG	p.Gln224Glu	isoniazid	No
katG	p.Gln295Pro	isoniazid	Yes
katG	p.Gln352*	isoniazid	No
katG	p.Gln434*	isoniazid	No
katG	p.Gln461Pro	isoniazid	Yes
katG	p.Gln502His	isoniazid	No
katG	p.Gln525Pro	isoniazid	Yes
katG	p.Gln717Pro	isoniazid	No
katG	p.Gln88Arg	isoniazid	No
katG	p.Glu195Lys	isoniazid	Yes
katG	p.Glu261Lys	isoniazid	No
katG	p.Glu289Asp	isoniazid	No
katG	p.Glu607Lys	isoniazid	No
katG	p.Gly121Cys	isoniazid	No
katG	p.Gly121Val	isoniazid	No
katG	p.Gly125Cys	isoniazid	No
katG	p.Gly169Ala	isoniazid	No
katG	p.Gly186Val	isoniazid	No
katG	p.Gly19Asp	isoniazid	No
katG	p.Gly234Arg	isoniazid	No
katG	p.Gly234Glu	isoniazid	No
katG	p.Gly279Asp	isoniazid	Yes
katG	p.Gly285Asp	isoniazid	Yes
katG	p.Gly297Val	isoniazid	Yes
katG	p.Gly299Ala	isoniazid	No
katG	p.Gly299Cys	isoniazid	No
katG	p.Gly305Ala	isoniazid	No
katG	p.Gly307Ala	isoniazid	No
katG	p.Gly307Arg	isoniazid	No
katG	p.Gly307Glu	isoniazid	No
katG	p.Gly309Asp	isoniazid	No
katG	p.Gly309Cys	isoniazid	No
katG	p.Gly309Ser	isoniazid	No
katG	p.Gly316Asp	isoniazid	No
katG	p.Gly316Ser	isoniazid	No
katG	p.Gly428Arg	isoniazid	No
katG	p.Gly485Val	isoniazid	No
katG	p.Gly491Cys	isoniazid	No
katG	p.Gly593Asp	isoniazid	No
katG	p.Gly629Ser	isoniazid	No
katG	p.Gly685Arg	isoniazid	No
katG	p.Gly96Cys	isoniazid	No
katG	p.Gly99Glu	isoniazid	Yes
katG	p.His108Asp	isoniazid	No
katG	p.His108Gln	isoniazid	No
katG	p.Ile317Leu	isoniazid	Yes
katG	p.Ile317Val	isoniazid	Yes
katG	p.Ile335Thr	isoniazid	Yes
katG	p.Ile335Val	isoniazid	Yes
katG	p.Ile393Asn	isoniazid	Yes
katG	p.Ile462Thr	isoniazid	No
katG	p.Ile71Asn	isoniazid	No
katG	p.Leu141Phe	isoniazid	Yes
katG	p.Leu148Arg	isoniazid	No
katG	p.Leu336Arg	isoniazid	No
katG	p.Leu378Pro	isoniazid	Yes
katG	p.Leu384Arg	isoniazid	Yes
katG	p.Leu449Phe	isoniazid	No
katG	p.Leu48Gln	isoniazid	No
katG	p.Leu587Met	isoniazid	No
katG	p.Leu587Pro	isoniazid	Yes
katG	p.Leu619Pro	isoniazid	No
katG	p.Leu634Phe	isoniazid	No
katG	p.Leu653Pro	isoniazid	No
katG	p.Lys143Thr	isoniazid	No
katG	p.Lys200*	isoniazid	No
katG	p.Lys345Thr	isoniazid	No
katG	p.Lys414Asn	isoniazid	No
katG	p.Lys459*	isoniazid	No
katG	p.Lys488Asn	isoniazid	No
katG	p.Met126Ile	isoniazid	Yes
katG	p.Met176Ile	isoniazid	No
katG	p.Met257Ile	isoniazid	Yes
katG	p.Met257Thr	isoniazid	No
katG	p.Met609Ile	isoniazid	No
katG	p.Met84Ile	isoniazid	Yes
katG	p.Phe252Leu	isoniazid	No
katG	p.Phe567Ser	isoniazid	Yes
katG	p.Pro241Pro	isoniazid	No
katG	p.Pro2Ser	isoniazid	No
katG	p.Pro365Leu	isoniazid	No
katG	p.Pro429Ser	isoniazid	No
katG	p.Pro589Thr	isoniazid	No
katG	p.Ser140Arg	isoniazid	Yes
katG	p.Ser140Asn	isoniazid	Yes
katG	p.Ser140Gly	isoniazid	Yes
katG	p.Ser160Leu	isoniazid	No
katG	p.Ser17Asn	isoniazid	Yes
katG	p.Ser302Arg	isoniazid	Yes
katG	p.Ser315Arg	isoniazid	Yes
katG	p.Ser315Asn	isoniazid	Yes
katG	p.Ser315Gly	isoniazid	Yes
katG	p.Ser315Ile	isoniazid	Yes
katG	p.Ser315Thr	isoniazid	Yes
katG	p.Ser331Cys	isoniazid	No
katG	p.Ser457Ile	isoniazid	No
katG	p.Ser700Pro	isoniazid	Yes
katG	p.Thr11Ala	isoniazid	No
katG	p.Thr12Pro	isoniazid	No
katG	p.Thr180Lys	isoniazid	Yes
katG	p.Thr251Met	isoniazid	No
katG	p.Thr262Arg	isoniazid	No
katG	p.Thr275Ala	isoniazid	Yes
katG	p.Thr275Pro	isoniazid	No
katG	p.Thr275Ser	isoniazid	No
katG	p.Thr308Pro	isoniazid	No
katG	p.Thr324Pro	isoniazid	No
katG	p.Thr326Met	isoniazid	Yes
katG	p.Thr380Ile	isoniazid	Yes
katG	p.Thr394Ala	isoniazid	Yes
katG	p.Thr435Ile	isoniazid	No
katG	p.Thr85Pro	isoniazid	No
katG	p.Trp107Arg	isoniazid	No
katG	p.Trp107*	isoniazid	No
katG	p.Trp191Arg	isoniazid	Yes
katG	p.Trp198*	isoniazid	No
katG	p.Trp300Gly	isoniazid	No
katG	p.Trp300*	isoniazid	No
katG	p.Trp321Arg	isoniazid	No
katG	p.Trp321Cys	isoniazid	No
katG	p.Trp321*	isoniazid	No
katG	p.Trp321Leu	isoniazid	No
katG	p.Trp321Ser	isoniazid	No
katG	p.Trp328Cys	isoniazid	No
katG	p.Trp328Gly	isoniazid	No
katG	p.Trp328Leu	isoniazid	Yes
katG	p.Trp328Ser	isoniazid	Yes
katG	p.Trp341Ser	isoniazid	No
katG	p.Trp38*	isoniazid	No
katG	p.Trp397*	isoniazid	No
katG	p.Trp477*	isoniazid	No
katG	p.Trp505Arg	isoniazid	No
katG	p.Trp505Ser	isoniazid	No
katG	p.Trp728Cys	isoniazid	Yes
katG	p.Trp90*	isoniazid	No
katG	p.Trp91Arg	isoniazid	Yes
katG	p.Tyr155Cys	isoniazid	Yes
katG	p.Tyr155Ser	isoniazid	Yes
katG	p.Tyr229Phe	isoniazid	No
katG	p.Tyr304Ser	isoniazid	No
katG	p.Tyr337Cys	isoniazid	Yes
katG	p.Tyr337Phe	isoniazid	No
katG	p.Tyr413His	isoniazid	Yes
katG	p.Val1Ala	isoniazid	Yes
katG	p.Val1Leu	isoniazid	Yes
katG	p.Val230Ala	isoniazid	No
katG	p.Val473Phe	isoniazid	Yes
katG	p.Val710Ala	isoniazid	No
eis	c.-10G>A	kanamycin	Yes
eis	c.-10G>C	kanamycin	Yes
eis	c.-12C>T	kanamycin	Yes
eis	c.-13A>G	kanamycin	Yes
eis	c.-14C>T	kanamycin	Yes
eis	c.-15C>G	kanamycin	Yes
eis	c.-37G>T	kanamycin	Yes
eis	c.-53T>G	kanamycin	No
eis	c.-54G>T	kanamycin	No
eis	c.-8C>A	kanamycin	Yes
rrs	r.1401a>g	kanamycin	Yes
rrs	r.1402c>a	kanamycin	Yes
rrs	r.1402c>t	kanamycin	Yes
rrs	r.1484g>t	kanamycin	Yes
gyrA	p.Ala74Ser	levofloxacin	Yes
gyrA	p.Ala90Glu	levofloxacin	Yes
gyrA	p.Ala90Gly	levofloxacin	Yes
gyrA	p.Ala90Val	levofloxacin	Yes
gyrA	p.Arg68Gly	levofloxacin	No
gyrA	p.Asp89Asn	levofloxacin	Yes
gyrA	p.Asp94Ala	levofloxacin	Yes
gyrA	p.Asp94Asn	levofloxacin	Yes
gyrA	p.Asp94Gly	levofloxacin	Yes
gyrA	p.Asp94His	levofloxacin	Yes
gyrA	p.Asp94Tyr	levofloxacin	Yes
gyrA	p.Asp94Val	levofloxacin	Yes
gyrA	p.Gly88Ala	levofloxacin	Yes
gyrA	p.Gly88Cys	levofloxacin	Yes
gyrA	p.His70Arg	levofloxacin	Yes
gyrA	p.Ile92Met	levofloxacin	No
gyrA	p.Leu109Val	levofloxacin	No
gyrA	p.Pro102His	levofloxacin	Yes
gyrA	p.Ser69Thr	levofloxacin	No
gyrA	p.Ser91Ala	levofloxacin	Yes
gyrA	p.Ser91Pro	levofloxacin	Yes
gyrB	p.Ala504Thr	levofloxacin	Yes
gyrB	p.Ala504Val	levofloxacin	Yes
gyrB	p.Ala90Gly	levofloxacin	No
gyrB	p.Arg446Cys	levofloxacin	Yes
gyrB	p.Arg446His	levofloxacin	Yes
gyrB	p.Arg446Leu	levofloxacin	No
gyrB	p.Asn499Asp	levofloxacin	Yes
gyrB	p.Asn499Lys	levofloxacin	Yes
gyrB	p.Asn499Thr	levofloxacin	Yes
gyrB	p.Asn499Tyr	levofloxacin	Yes
gyrB	p.Asp461Ala	levofloxacin	Yes
gyrB	p.Asp461Asn	levofloxacin	Yes
gyrB	p.Asp461His	levofloxacin	Yes
gyrB	p.Asp494Ala	levofloxacin	Yes
gyrB	p.Gln538His	levofloxacin	No
gyrB	p.Glu501Asp	levofloxacin	Yes
gyrB	p.Glu501Val	levofloxacin	Yes
gyrB	p.Gly470Ala	levofloxacin	No
gyrB	p.Gly470Cys	levofloxacin	No
gyrB	p.Ile486Leu	levofloxacin	Yes
gyrB	p.Ser447Phe	levofloxacin	Yes
gyrB	p.Thr500Asn	levofloxacin	Yes
gyrB	p.Thr500Ile	levofloxacin	Yes
gyrB	p.Thr500Pro	levofloxacin	Yes
gyrB	p.Thr507Met	levofloxacin	No
gyrB	p.Val670Phe	levofloxacin	Yes
rplC	p.Cys154Arg	linezolid	Yes
rrl	r.2299g>t	linezolid	No
rrl	r.2814g>t	linezolid	Yes
gyrA	p.Ala74Ser	moxifloxacin	Yes
gyrA	p.Ala90Glu	moxifloxacin	Yes
gyrA	p.Ala90Gly	moxifloxacin	Yes
gyrA	p.Ala90Val	moxifloxacin	Yes
gyrA	p.Arg68Gly	moxifloxacin	No
gyrA	p.Asp89Asn	moxifloxacin	Yes
gyrA	p.Asp94Ala	moxifloxacin	Yes
gyrA	p.Asp94Asn	moxifloxacin	Yes
gyrA	p.Asp94Gly	moxifloxacin	Yes
gyrA	p.Asp94His	moxifloxacin	Yes
gyrA	p.Asp94Tyr	moxifloxacin	Yes
gyrA	p.Asp94Val	moxifloxacin	Yes
gyrA	p.Gly88Ala	moxifloxacin	Yes
gyrA	p.Gly88Cys	moxifloxacin	Yes
gyrA	p.His70Arg	moxifloxacin	Yes
gyrA	p.Ile92Met	moxifloxacin	No
gyrA	p.Leu109Val	moxifloxacin	No
gyrA	p.Pro102His	moxifloxacin	Yes
gyrA	p.Ser69Thr	moxifloxacin	No
gyrA	p.Ser91Ala	moxifloxacin	Yes
gyrA	p.Ser91Pro	moxifloxacin	Yes
gyrB	p.Ala504Thr	moxifloxacin	Yes
gyrB	p.Ala504Val	moxifloxacin	Yes
gyrB	p.Ala90Gly	moxifloxacin	No
gyrB	p.Arg446Cys	moxifloxacin	Yes
gyrB	p.Arg446His	moxifloxacin	Yes
gyrB	p.Arg446Leu	moxifloxacin	No
gyrB	p.Asn499Asp	moxifloxacin	Yes
gyrB	p.Asn499Lys	moxifloxacin	Yes
gyrB	p.Asn499Thr	moxifloxacin	Yes
gyrB	p.Asn499Tyr	moxifloxacin	Yes
gyrB	p.Asp461Ala	moxifloxacin	Yes
gyrB	p.Asp461Asn	moxifloxacin	Yes
gyrB	p.Asp461His	moxifloxacin	Yes
gyrB	p.Asp494Ala	moxifloxacin	Yes
gyrB	p.Gln538His	moxifloxacin	No
gyrB	p.Glu501Asp	moxifloxacin	Yes
gyrB	p.Glu501Val	moxifloxacin	Yes
gyrB	p.Gly470Ala	moxifloxacin	No
gyrB	p.Gly470Cys	moxifloxacin	No
gyrB	p.Ile486Leu	moxifloxacin	Yes
gyrB	p.Ser447Phe	moxifloxacin	Yes
gyrB	p.Thr500Asn	moxifloxacin	Yes
gyrB	p.Thr500Ile	moxifloxacin	Yes
gyrB	p.Thr500Pro	moxifloxacin	Yes
gyrB	p.Thr507Met	moxifloxacin	No
gyrB	p.Val670Phe	moxifloxacin	Yes
gyrA	p.Ala74Ser	ofloxacin	Yes
gyrA	p.Ala90Glu	ofloxacin	Yes
gyrA	p.Ala90Gly	ofloxacin	Yes
gyrA	p.Ala90Val	ofloxacin	Yes
gyrA	p.Arg68Gly	ofloxacin	No
gyrA	p.Asp89Asn	ofloxacin	Yes
gyrA	p.Asp94Ala	ofloxacin	Yes
gyrA	p.Asp94Asn	ofloxacin	Yes
gyrA	p.Asp94Gly	ofloxacin	Yes
gyrA	p.Asp94His	ofloxacin	Yes
gyrA	p.Asp94Tyr	ofloxacin	Yes
gyrA	p.Asp94Val	ofloxacin	Yes
gyrA	p.Gly88Ala	ofloxacin	Yes
gyrA	p.Gly88Cys	ofloxacin	Yes
gyrA	p.His70Arg	ofloxacin	Yes
gyrA	p.Ile92Met	ofloxacin	No
gyrA	p.Leu109Val	ofloxacin	No
gyrA	p.Pro102His	ofloxacin	Yes
gyrA	p.Ser69Thr	ofloxacin	No
gyrA	p.Ser91Ala	ofloxacin	Yes
gyrA	p.Ser91Pro	ofloxacin	Yes
gyrB	p.Ala504Thr	ofloxacin	Yes
gyrB	p.Ala504Val	ofloxacin	Yes
gyrB	p.Ala90Gly	ofloxacin	No
gyrB	p.Arg446Cys	ofloxacin	Yes
gyrB	p.Arg446His	ofloxacin	Yes
gyrB	p.Arg446Leu	ofloxacin	No
gyrB	p.Asn499Asp	ofloxacin	Yes
gyrB	p.Asn499Lys	ofloxacin	Yes
gyrB	p.Asn499Thr	ofloxacin	Yes
gyrB	p.Asn499Tyr	ofloxacin	Yes
gyrB	p.Asp461Ala	ofloxacin	Yes
gyrB	p.Asp461Asn	ofloxacin	Yes
gyrB	p.Asp461His	ofloxacin	Yes
gyrB	p.Asp494Ala	ofloxacin	Yes
gyrB	p.Gln538His	ofloxacin	No
gyrB	p.Glu501Asp	ofloxacin	Yes
gyrB	p.Glu501Val	ofloxacin	Yes
gyrB	p.Gly470Ala	ofloxacin	No
gyrB	p.Gly470Cys	ofloxacin	No
gyrB	p.Ile486Leu	ofloxacin	Yes
gyrB	p.Ser447Phe	ofloxacin	Yes
gyrB	p.Thr500Asn	ofloxacin	Yes
gyrB	p.Thr500Ile	ofloxacin	Yes
gyrB	p.Thr500Pro	ofloxacin	Yes
gyrB	p.Thr507Met	ofloxacin	No
gyrB	p.Val670Phe	ofloxacin	Yes
folC	p.Ala183Pro	para-aminosalicylic_acid	No
folC	p.Arg49Pro	para-aminosalicylic_acid	Yes
folC	p.Arg49Trp	para-aminosalicylic_acid	Yes
folC	p.Arg91Trp	para-aminosalicylic_acid	No
folC	p.Asn73Ser	para-aminosalicylic_acid	No
folC	p.Glu153Ala	para-aminosalicylic_acid	Yes
folC	p.Glu153Gly	para-aminosalicylic_acid	Yes
folC	p.Glu40Gln	para-aminosalicylic_acid	Yes
folC	p.Glu40Gly	para-aminosalicylic_acid	Yes
folC	p.Ile43Ser	para-aminosalicylic_acid	Yes
folC	p.Ile43Thr	para-aminosalicylic_acid	Yes
folC	p.Leu56Val	para-aminosalicylic_acid	No
folC	p.Phe152Leu	para-aminosalicylic_acid	No
folC	p.Phe152Ser	para-aminosalicylic_acid	No
folC	p.Ser150Arg	para-aminosalicylic_acid	No
folC	p.Ser150Cys	para-aminosalicylic_acid	No
folC	p.Ser150Gly	para-aminosalicylic_acid	Yes
folC	p.Thr20Pro	para-aminosalicylic_acid	Yes
ribD	p.Gly8Arg	para-aminosalicylic_acid	Yes
thyA	c.111del	para-aminosalicylic_acid	No
thyA	c.218_219insCACGAGCAC	para-aminosalicylic_acid	No
thyA	c.260del	para-aminosalicylic_acid	No
thyA	c.373_374insT	para-aminosalicylic_acid	No
thyA	c.472del	para-aminosalicylic_acid	No
thyA	large_deletion	para-aminosalicylic_acid	No
thyA	p.Arg126Gln	para-aminosalicylic_acid	No
thyA	p.Arg222Gly	para-aminosalicylic_acid	Yes
thyA	p.Arg235Pro	para-aminosalicylic_acid	Yes
thyA	p.Cys161Tyr	para-aminosalicylic_acid	No
thyA	p.Gly76*	para-aminosalicylic_acid	No
thyA	p.Gly91Arg	para-aminosalicylic_acid	No
thyA	p.His207Arg	para-aminosalicylic_acid	Yes
thyA	p.His75Asn	para-aminosalicylic_acid	Yes
thyA	p.Phe152Val	para-aminosalicylic_acid	Yes
thyA	p.Pro224Leu	para-aminosalicylic_acid	No
thyA	p.Ser105Pro	para-aminosalicylic_acid	No
thyA	p.Thr22Ala	para-aminosalicylic_acid	Yes
thyA	p.Trp101Arg	para-aminosalicylic_acid	No
thyA	p.Trp83Cys	para-aminosalicylic_acid	No
thyA	p.Trp83*	para-aminosalicylic_acid	No
thyA	p.Trp98*	para-aminosalicylic_acid	No
thyA	p.Tyr36Cys	para-aminosalicylic_acid	No
thyA	p.Val77Phe	para-aminosalicylic_acid	Yes
thyX	c.-16C>T	para-aminosalicylic_acid	Yes
panD	c.393del	pyrazinamide	No
panD	p.Ala128Ser	pyrazinamide	No
panD	p.Glu126*	pyrazinamide	No
panD	p.Glu130Gly	pyrazinamide	No
panD	p.His21Arg	pyrazinamide	No
panD	p.Ile49Val	pyrazinamide	Yes
panD	p.Leu136Arg	pyrazinamide	No
panD	p.Met117Ile	pyrazinamide	Yes
panD	p.Val138Ala	pyrazinamide	Yes
panD	p.Val138Glu	pyrazinamide	No
panD	p.Val138Gly	pyrazinamide	No
pncA	c.101_102insT	pyrazinamide	No
pncA	c.-10T>C	pyrazinamide	Yes
pncA	c.1_11del	pyrazinamide	No
pncA	c.117_118insC	pyrazinamide	No
pncA	c.118_150del	pyrazinamide	No
pncA	c.-11A>C	pyrazinamide	Yes
pncA	c.-11A>G	pyrazinamide	Yes
pncA	c.12_14del	pyrazinamide	Yes
pncA	c.-12T>C	pyrazinamide	Yes
pncA	c.-12T>G	pyrazinamide	Yes
pncA	c.137_138insG	pyrazinamide	No
pncA	c.158del	pyrazinamide	No
pncA	c.16_17insC	pyrazinamide	No
pncA	c.161del	pyrazinamide	No
pncA	c.162_164del	pyrazinamide	Yes
pncA	c.162del	pyrazinamide	No
pncA	c.163_164insT	pyrazinamide	No
pncA	c.172del	pyrazinamide	No
pncA	c.189_200del	pyrazinamide	Yes
pncA	c.1_8del	pyrazinamide	No
pncA	c.193_194insA	pyrazinamide	No
pncA	c.194_195insA	pyrazinamide	Yes
pncA	c.210_211insACC	pyrazinamide	No
pncA	c.210_211insC	pyrazinamide	No
pncA	c.219_220insCGCATTGCCG	pyrazinamide	No
pncA	c.222_223insG	pyrazinamide	No
pncA	c.239del	pyrazinamide	No
pncA	c.250_251insC	pyrazinamide	No
pncA	c.272_276del	pyrazinamide	Yes
pncA	c.288_289insT	pyrazinamide	No
pncA	c.288del	pyrazinamide	No
pncA	c.28del	pyrazinamide	No
pncA	c.302_303insA	pyrazinamide	No
pncA	c.302_303insG	pyrazinamide	No
pncA	c.306_309del	pyrazinamide	Yes
pncA	c.307_308insC	pyrazinamide	No
pncA	c.307_311del	pyrazinamide	No
pncA	c.312del	pyrazinamide	No
pncA	c.315_316insG	pyrazinamide	No
pncA	c.341del	pyrazinamide	No
pncA	c.369_370insAG	pyrazinamide	No
pncA	c.375_389del	pyrazinamide	Yes
pncA	c.379_389del	pyrazinamide	No
pncA	c.380_388del	pyrazinamide	Yes
pncA	c.381_382del	pyrazinamide	No
pncA	c.383_384insAG	pyrazinamide	No
pncA	c.386_388del	pyrazinamide	No
pncA	c.386_389del	pyrazinamide	Yes
pncA	c.389_390insAGGTCGATG	pyrazinamide	No
pncA	c.389_390insGAGGTCGAT	pyrazinamide	No
pncA	c.389del	pyrazinamide	No
pncA	c.391del	pyrazinamide	No
pncA	c.392_393insGG	pyrazinamide	No
pncA	c.392_393insG	pyrazinamide	No
pncA	c.393_394insG	pyrazinamide	Yes
pncA	c.395_405del	pyrazinamide	No
pncA	c.395del	pyrazinamide	No
pncA	c.398_399insT	pyrazinamide	No
pncA	c.404_405insC	pyrazinamide	No
pncA	c.406del	pyrazinamide	No
pncA	c.408_409insC	pyrazinamide	No
pncA	c.415_416insG	pyrazinamide	No
pncA	c.416_417del	pyrazinamide	No
pncA	c.416del	pyrazinamide	No
pncA	c.421_422insGG	pyrazinamide	No
pncA	c.421_422insG	pyrazinamide	No
pncA	c.422del	pyrazinamide	No
pncA	c.429_430insGG	pyrazinamide	No
pncA	c.436del	pyrazinamide	No
pncA	c.443del	pyrazinamide	No
pncA	c.446_453del	pyrazinamide	No
pncA	c.452del	pyrazinamide	No
pncA	c.457_458insC	pyrazinamide	No
pncA	c.466_467insT	pyrazinamide	No
pncA	c.471_472insA	pyrazinamide	No
pncA	c.475del	pyrazinamide	No
pncA	c.47del	pyrazinamide	No
pncA	c.481_482insTGAC	pyrazinamide	No
pncA	c.495del	pyrazinamide	No
pncA	c.502_503insGC	pyrazinamide	No
pncA	c.512del	pyrazinamide	No
pncA	c.518_519insG	pyrazinamide	No
pncA	c.521_522insT	pyrazinamide	No
pncA	c.533_534insC	pyrazinamide	No
pncA	c.53_54insGG	pyrazinamide	No
pncA	c.59del	pyrazinamide	No
pncA	c.64del	pyrazinamide	No
pncA	c.68_78del	pyrazinamide	Yes
pncA	c.70del	pyrazinamide	No
pncA	c.71del	pyrazinamide	No
pncA	c.-7T>C	pyrazinamide	Yes
pncA	c.84del	pyrazinamide	No
pncA	c.88_111del	pyrazinamide	No
pncA	frameshift	pyrazinamide	No
pncA	large_deletion	pyrazinamide	No
pncA	p.Ala102Thr	pyrazinamide	Yes
pncA	p.Ala134Ser	pyrazinamide	No
pncA	p.Ala134Val	pyrazinamide	Yes
pncA	p.Ala143Asp	pyrazinamide	Yes
pncA	p.Ala143Pro	pyrazinamide	Yes
pncA	p.Ala143Thr	pyrazinamide	Yes
pncA	p.Ala146Glu	pyrazinamide	Yes
pncA	p.Ala146Thr	pyrazinamide	Yes
pncA	p.Ala146Val	pyrazinamide	Yes
pncA	p.Ala161Pro	pyrazinamide	No
pncA	p.Ala165Thr	pyrazinamide	No
pncA	p.Ala171Glu	pyrazinamide	Yes
pncA	p.Ala171Pro	pyrazinamide	Yes
pncA	p.Ala171Thr	pyrazinamide	Yes
pncA	p.Ala171Val	pyrazinamide	Yes
pncA	p.Ala26Gly	pyrazinamide	No
pncA	p.Ala28Asp	pyrazinamide	No
pncA	p.Ala3Glu	pyrazinamide	Yes
pncA	p.Ala3Pro	pyrazinamide	No
pncA	p.Ala46Glu	pyrazinamide	Yes
pncA	p.Ala46Pro	pyrazinamide	Yes
pncA	p.Ala46Val	pyrazinamide	Yes
pncA	p.Ala79Gly	pyrazinamide	No
pncA	p.Arg121Pro	pyrazinamide	Yes
pncA	p.Arg123Pro	pyrazinamide	Yes
pncA	p.Arg140Gly	pyrazinamide	No
pncA	p.Arg140His	pyrazinamide	No
pncA	p.Arg140Pro	pyrazinamide	Yes
pncA	p.Arg140Ser	pyrazinamide	No
pncA	p.Arg148Ser	pyrazinamide	No
pncA	p.Arg154Gly	pyrazinamide	Yes
pncA	p.Arg154Met	pyrazinamide	No
pncA	p.Asn118Thr	pyrazinamide	No
pncA	p.Asp12Ala	pyrazinamide	Yes
pncA	p.Asp12Asn	pyrazinamide	Yes
pncA	p.Asp12Glu	pyrazinamide	Yes
pncA	p.Asp12Gly	pyrazinamide	Yes
pncA	p.Asp136Asn	pyrazinamide	Yes
pncA	p.Asp136Gly	pyrazinamide	Yes
pncA	p.Asp136His	pyrazinamide	No
pncA	p.Asp136Tyr	pyrazinamide	Yes
pncA	p.Asp145Glu	pyrazinamide	Yes
pncA	p.Asp49Ala	pyrazinamide	Yes
pncA	p.Asp49Asn	pyrazinamide	Yes
pncA	p.Asp49Glu	pyrazinamide	Yes
pncA	p.Asp49Gly	pyrazinamide	Yes
pncA	p.Asp49His	pyrazinamide	No
pncA	p.Asp49Tyr	pyrazinamide	Yes
pncA	p.Asp49Val	pyrazinamide	No
pncA	p.Asp53Ala	pyrazinamide	No
pncA	p.Asp53Asn	pyrazinamide	No
pncA	p.Asp63Ala	pyrazinamide	Yes
pncA	p.Asp63Gly	pyrazinamide	Yes
pncA	p.Asp63His	pyrazinamide	Yes
pncA	p.Asp8Ala	pyrazinamide	Yes
pncA	p.Asp8Asn	pyrazinamide	Yes
pncA	p.Asp8Glu	pyrazinamide	Yes
pncA	p.Asp8Gly	pyrazinamide	Yes
pncA	p.Asp8Tyr	pyrazinamide	No
pncA	p.Cys138Arg	pyrazinamide	Yes
pncA	p.Cys138*	pyrazinamide	No
pncA	p.Cys138Ser	pyrazinamide	No
pncA	p.Cys138Tyr	pyrazinamide	Yes
pncA	p.Cys14Arg	pyrazinamide	Yes
pncA	p.Cys14Gly	pyrazinamide	Yes
pncA	p.Cys14*	pyrazinamide	No
pncA	p.Cys14Trp	pyrazinamide	Yes
pncA	p.Cys14Tyr	pyrazinamide	Yes
pncA	p.Cys72Arg	pyrazinamide	Yes
pncA	p.Cys72*	pyrazinamide	No
pncA	p.Cys72Trp	pyrazinamide	No
pncA	p.Cys72Tyr	pyrazinamide	Yes
pncA	p.Gln10Arg	pyrazinamide	Yes
pncA	p.Gln10His	pyrazinamide	Yes
pncA	p.Gln10Lys	pyrazinamide	No
pncA	p.Gln10Pro	pyrazinamide	Yes
pncA	p.Gln10*	pyrazinamide	No
pncA	p.Gln141Pro	pyrazinamide	Yes
pncA	p.Gln141*	pyrazinamide	No
pncA	p.Glu107*	pyrazinamide	No
pncA	p.Glu174Gly	pyrazinamide	Yes
pncA	p.Glu181Asp	pyrazinamide	No
pncA	p.Glu37*	pyrazinamide	No
pncA	p.Gly105Arg	pyrazinamide	Yes
pncA	p.Gly105Asp	pyrazinamide	Yes
pncA	p.Gly105Val	pyrazinamide	Yes
pncA	p.Gly108Arg	pyrazinamide	Yes
pncA	p.Gly132Ala	pyrazinamide	Yes
pncA	p.Gly132Asp	pyrazinamide	Yes
pncA	p.Gly132Ser	pyrazinamide	Yes
pncA	p.Gly132Val	pyrazinamide	No
pncA	p.Gly162Asp	pyrazinamide	Yes
pncA	p.Gly17Asp	pyrazinamide	Yes
pncA	p.Gly17Val	pyrazinamide	No
pncA	p.Gly23Val	pyrazinamide	No
pncA	p.Gly24Arg	pyrazinamide	Yes
pncA	p.Gly24Asp	pyrazinamide	Yes
pncA	p.Gly78Asp	pyrazinamide	No
pncA	p.Gly78Cys	pyrazinamide	Yes
pncA	p.Gly78Ser	pyrazinamide	Yes
pncA	p.Gly78Val	pyrazinamide	Yes
pncA	p.Gly97Arg	pyrazinamide	Yes
pncA	p.Gly97Asp	pyrazinamide	Yes
pncA	p.Gly97Cys	pyrazinamide	Yes
pncA	p.Gly97Ser	pyrazinamide	Yes
pncA	p.His137Arg	pyrazinamide	Yes
pncA	p.His137Pro	pyrazinamide	No
pncA	p.His43Pro	pyrazinamide	Yes
pncA	p.His51Arg	pyrazinamide	Yes
pncA	p.His51Asn	pyrazinamide	Yes
pncA	p.His51Asp	pyrazinamide	Yes
pncA	p.His51Gln	pyrazinamide	Yes
pncA	p.His51Pro	pyrazinamide	Yes
pncA	p.His51Tyr	pyrazinamide	Yes
pncA	p.His57Arg	pyrazinamide	Yes
pncA	p.His57Asn	pyrazinamide	No
pncA	p.His57Asp	pyrazinamide	Yes
pncA	p.His57Leu	pyrazinamide	No
pncA	p.His57Pro	pyrazinamide	Yes
pncA	p.His57Tyr	pyrazinamide	Yes
pncA	p.His71Arg	pyrazinamide	Yes
pncA	p.His71Asn	pyrazinamide	No
pncA	p.His71Asp	pyrazinamide	No
pncA	p.His71Gln	pyrazinamide	Yes
pncA	p.His71Tyr	pyrazinamide	Yes
pncA	p.His82Arg	pyrazinamide	Yes
pncA	p.His82Asp	pyrazinamide	Yes
pncA	p.His82Leu	pyrazinamide	No
pncA	p.His82Tyr	pyrazinamide	No
pncA	p.Ile133Asn	pyrazinamide	No
pncA	p.Ile133Thr	pyrazinamide	Yes
pncA	p.Ile31Ser	pyrazinamide	Yes
pncA	p.Ile5Ser	pyrazinamide	Yes
pncA	p.Ile5Thr	pyrazinamide	Yes
pncA	p.Ile6Met	pyrazinamide	Yes
pncA	p.Ile6Ser	pyrazinamide	Yes
pncA	p.Ile6Thr	pyrazinamide	Yes
pncA	p.Ile90Ser	pyrazinamide	Yes
pncA	p.Leu116Arg	pyrazinamide	Yes
pncA	p.Leu116Pro	pyrazinamide	Yes
pncA	p.Leu116Val	pyrazinamide	No
pncA	p.Leu120Pro	pyrazinamide	Yes
pncA	p.Leu151Ser	pyrazinamide	Yes
pncA	p.Leu156Pro	pyrazinamide	Yes
pncA	p.Leu159Arg	pyrazinamide	Yes
pncA	p.Leu159Pro	pyrazinamide	Yes
pncA	p.Leu159Val	pyrazinamide	Yes
pncA	p.Leu172Arg	pyrazinamide	Yes
pncA	p.Leu172Pro	pyrazinamide	Yes
pncA	p.Leu182Ser	pyrazinamide	Yes
pncA	p.Leu19Arg	pyrazinamide	No
pncA	p.Leu19Pro	pyrazinamide	Yes
pncA	p.Leu27Pro	pyrazinamide	Yes
pncA	p.Leu35Pro	pyrazinamide	Yes
pncA	p.Leu4Ser	pyrazinamide	Yes
pncA	p.Leu4Trp	pyrazinamide	Yes
pncA	p.Leu85Arg	pyrazinamide	Yes
pncA	p.Leu85Pro	pyrazinamide	Yes
pncA	p.Lys48Glu	pyrazinamide	Yes
pncA	p.Lys48Thr	pyrazinamide	Yes
pncA	p.Lys96Arg	pyrazinamide	Yes
pncA	p.Lys96Asn	pyrazinamide	Yes
pncA	p.Lys96Gln	pyrazinamide	Yes
pncA	p.Lys96Glu	pyrazinamide	Yes
pncA	p.Lys96Thr	pyrazinamide	Yes
pncA	p.Met175Arg	pyrazinamide	No
pncA	p.Met175Ile	pyrazinamide	Yes
pncA	p.Met175Lys	pyrazinamide	Yes
pncA	p.Met175Thr	pyrazinamide	Yes
pncA	p.Met175Val	pyrazinamide	Yes
pncA	p.Met1Thr	pyrazinamide	Yes
pncA	p.Phe106Ser	pyrazinamide	Yes
pncA	p.Phe13Ile	pyrazinamide	Yes
pncA	p.Phe13Leu	pyrazinamide	Yes
pncA	p.Phe13Ser	pyrazinamide	Yes
pncA	p.Phe58Leu	pyrazinamide	Yes
pncA	p.Phe58Ser	pyrazinamide	Yes
pncA	p.Phe81Val	pyrazinamide	Yes
pncA	p.Phe94Cys	pyrazinamide	Yes
pncA	p.Phe94Leu	pyrazinamide	Yes
pncA	p.Phe94Ser	pyrazinamide	Yes
pncA	p.Pro54Gln	pyrazinamide	Yes
pncA	p.Pro54Leu	pyrazinamide	Yes
pncA	p.Pro54Thr	pyrazinamide	No
pncA	p.Pro62Arg	pyrazinamide	Yes
pncA	p.Pro62Gln	pyrazinamide	No
pncA	p.Pro62Leu	pyrazinamide	Yes
pncA	p.Pro62Ser	pyrazinamide	Yes
pncA	p.Pro69Arg	pyrazinamide	Yes
pncA	p.Pro69Leu	pyrazinamide	Yes
pncA	p.Ser104Arg	pyrazinamide	Yes
pncA	p.Ser104Gly	pyrazinamide	Yes
pncA	p.Ser164Pro	pyrazinamide	Yes
pncA	p.Ser179Arg	pyrazinamide	No
pncA	p.Ser185Ile	pyrazinamide	No
pncA	p.Ser185Thr	pyrazinamide	No
pncA	p.Ser18Pro	pyrazinamide	Yes
pncA	p.Ser32Ile	pyrazinamide	Yes
pncA	p.Ser59Phe	pyrazinamide	Yes
pncA	p.Ser59Pro	pyrazinamide	Yes
pncA	p.Ser66Pro	pyrazinamide	Yes
pncA	p.Ser67Pro	pyrazinamide	Yes
pncA	p.Ser88*	pyrazinamide	No
pncA	p.Thr114Ala	pyrazinamide	No
pncA	p.Thr114Pro	pyrazinamide	Yes
pncA	p.Thr135Pro	pyrazinamide	Yes
pncA	p.Thr142Ala	pyrazinamide	Yes
pncA	p.Thr142Lys	pyrazinamide	Yes
pncA	p.Thr142Met	pyrazinamide	Yes
pncA	p.Thr142Pro	pyrazinamide	Yes
pncA	p.Thr153Asn	pyrazinamide	No
pncA	p.Thr160Arg	pyrazinamide	Yes
pncA	p.Thr160Pro	pyrazinamide	Yes
pncA	p.Thr168Asn	pyrazinamide	Yes
pncA	p.Thr168Pro	pyrazinamide	Yes
pncA	p.Thr47Ala	pyrazinamide	Yes
pncA	p.Thr47Pro	pyrazinamide	Yes
pncA	p.Thr47Ser	pyrazinamide	No
pncA	p.Thr61Pro	pyrazinamide	Yes
pncA	p.Thr76Ile	pyrazinamide	Yes
pncA	p.Thr76Pro	pyrazinamide	Yes
pncA	p.Trp119Arg	pyrazinamide	Yes
pncA	p.Trp119Cys	pyrazinamide	No
pncA	p.Trp119*	pyrazinamide	No
pncA	p.Trp119Ser	pyrazinamide	Yes
pncA	p.Trp68Arg	pyrazinamide	Yes
pncA	p.Trp68Cys	pyrazinamide	Yes
pncA	p.Trp68Gly	pyrazinamide	Yes
pncA	p.Trp68Leu	pyrazinamide	Yes
pncA	p.Trp68*	pyrazinamide	No
pncA	p.Trp68Ser	pyrazinamide	Yes
pncA	p.Tyr103Cys	pyrazinamide	Yes
pncA	p.Tyr103His	pyrazinamide	Yes
pncA	p.Tyr103*	pyrazinamide	No
pncA	p.Tyr103Ser	pyrazinamide	No
pncA	p.Tyr34Asp	pyrazinamide	Yes
pncA	p.Tyr34*	pyrazinamide	No
pncA	p.Tyr34Ser	pyrazinamide	Yes
pncA	p.Tyr41His	pyrazinamide	No
pncA	p.Tyr41*	pyrazinamide	No
pncA	p.Tyr64Asp	pyrazinamide	Yes
pncA	p.Tyr95*	pyrazinamide	No
pncA	p.Tyr99*	pyrazinamide	No
pncA	p.Val125Asp	pyrazinamide	Yes
pncA	p.Val125Gly	pyrazinamide	Yes
pncA	p.Val128Gly	pyrazinamide	Yes
pncA	p.Val130Ala	pyrazinamide	Yes
pncA	p.Val130Glu	pyrazinamide	Yes
pncA	p.Val130Gly	pyrazinamide	Yes
pncA	p.Val131Phe	pyrazinamide	Yes
pncA	p.Val139Ala	pyrazinamide	Yes
pncA	p.Val139Gly	pyrazinamide	Yes
pncA	p.Val139Leu	pyrazinamide	Yes
pncA	p.Val139Met	pyrazinamide	Yes
pncA	p.Val155Ala	pyrazinamide	Yes
pncA	p.Val155Gly	pyrazinamide	Yes
pncA	p.Val155Leu	pyrazinamide	No
pncA	p.Val155Met	pyrazinamide	Yes
pncA	p.Val180Gly	pyrazinamide	Yes
pncA	p.Val180Phe	pyrazinamide	Yes
pncA	p.Val21Ala	pyrazinamide	Yes
pncA	p.Val21Gly	pyrazinamide	Yes
pncA	p.Val44Gly	pyrazinamide	Yes
pncA	p.Val45Gly	pyrazinamide	Yes
pncA	p.Val7Asp	pyrazinamide	No
pncA	p.Val7Gly	pyrazinamide	Yes
pncA	p.Val7Ile	pyrazinamide	Yes
pncA	p.Val7Leu	pyrazinamide	Yes
pncA	p.Val7Phe	pyrazinamide	Yes
pncA	p.Val9Ala	pyrazinamide	Yes
pncA	p.Val9Gly	pyrazinamide	Yes
pncA	p.Val9Leu	pyrazinamide	No
rpsA	p.Arg474Leu	pyrazinamide	No
rpsA	p.Arg474Trp	pyrazinamide	No
rpsA	p.Glu433Asp	pyrazinamide	No
rpoB	any_missense_codon_445	rifampicin	No
rpoB	any_missense_codon_450	rifampicin	No
rpoB	c.1275_1280del	rifampicin	No
rpoB	c.1276_1281del	rifampicin	No
rpoB	c.1282_1290del	rifampicin	Yes
rpoB	c.1293_1294insTTCATG	rifampicin	No
rpoB	c.1293_1294insTTC	rifampicin	No
rpoB	c.1294_1299del	rifampicin	No
rpoB	c.1295_1303del	rifampicin	Yes
rpoB	c.1296_1297insCGG	rifampicin	No
rpoB	c.1296_1297insTTC	rifampicin	No
rpoB	c.1297_1299del	rifampicin	No
rpoB	c.1297_1305del	rifampicin	No
rpoB	c.1299_1300insTTC	rifampicin	No
rpoB	c.1299_1301del	rifampicin	No
rpoB	c.1299_1310del	rifampicin	No
rpoB	c.1300_1311del	rifampicin	No
rpoB	c.1302_1307del	rifampicin	Yes
rpoB	c.1303_1308del	rifampicin	No
rpoB	c.1306_1308del	rifampicin	Yes
rpoB	c.1306_1311del	rifampicin	No
rpoB	c.1308_1313del	rifampicin	No
rpoB	c.1312_1314del	rifampicin	No
rpoB	c.1327_1332del	rifampicin	Yes
rpoB	c.1336_1338del	rifampicin	No
rpoB	c.1648_1649insAGC	rifampicin	No
rpoB	c.289_290insTGTCGT	rifampicin	No
rpoB	p.Ala286Val	rifampicin	Yes
rpoB	p.Arg447His	rifampicin	No
rpoB	p.Arg447Pro	rifampicin	No
rpoB	p.Arg448Lys	rifampicin	Yes
rpoB	p.Arg552Cys	rifampicin	Yes
rpoB	p.Asn437Asp	rifampicin	Yes
rpoB	p.Asn437His	rifampicin	Yes
rpoB	p.Asn437Ile	rifampicin	No
rpoB	p.Asn437Thr	rifampicin	No
rpoB	p.Asn437Tyr	rifampicin	Yes
rpoB	p.Asn438Lys	rifampicin	No
rpoB	p.Asp435Ala	rifampicin	Yes
rpoB	p.Asp435Ala	rifampicin	Yes
rpoB	p.Asp435Asn	rifampicin	Yes
rpoB	p.Asp435Glu	rifampicin	Yes
rpoB	p.Asp435Gly	rifampicin	Yes
rpoB	p.Asp435His	rifampicin	Yes
rpoB	p.Asp435Phe	rifampicin	Yes
rpoB	p.Asp435Tyr	rifampicin	Yes
rpoB	p.Asp435Val	rifampicin	Yes
rpoB	p.Gln409His	rifampicin	No
rpoB	p.Gln429His	rifampicin	Yes
rpoB	p.Gln429Lys	rifampicin	No
rpoB	p.Gln432Arg	rifampicin	No
rpoB	p.Gln432Glu	rifampicin	Yes
rpoB	p.Gln432His	rifampicin	Yes
rpoB	p.Gln432Leu	rifampicin	Yes
rpoB	p.Gln432Lys	rifampicin	Yes
rpoB	p.Gln432Pro	rifampicin	Yes
rpoB	p.Gln432*	rifampicin	No
rpoB	p.Gln436His	rifampicin	No
rpoB	p.Gln436Leu	rifampicin	No
rpoB	p.Glu423Ala	rifampicin	No
rpoB	p.Glu460Gly	rifampicin	Yes
rpoB	p.Glu481Gly	rifampicin	No
rpoB	p.Glu592Asp	rifampicin	No
rpoB	p.Glu761Asp	rifampicin	Yes
rpoB	p.Gly426Asp	rifampicin	No
rpoB	p.Gly426Ser	rifampicin	No
rpoB	p.Gly442Ala	rifampicin	No
rpoB	p.Gly442Trp	rifampicin	No
rpoB	p.Gly981Asp	rifampicin	Yes
rpoB	p.Ile480Thr	rifampicin	Yes
rpoB	p.Ile480Val	rifampicin	Yes
rpoB	p.Ile491Phe	rifampicin	Yes
rpoB	p.Leu430Arg	rifampicin	Yes
rpoB	p.Leu430Pro	rifampicin	Yes
rpoB	p.Leu430Val	rifampicin	Yes
rpoB	p.Leu440Leu	rifampicin	No
rpoB	p.Leu440Met	rifampicin	No
rpoB	p.Leu440Pro	rifampicin	No
rpoB	p.Leu443Ser	rifampicin	No
rpoB	p.Leu443Trp	rifampicin	Yes
rpoB	p.Leu452Pro	rifampicin	Yes
rpoB	p.Leu457Pro	rifampicin	No
rpoB	p.Leu464Met	rifampicin	Yes
rpoB	p.Leu490Val	rifampicin	No
rpoB	p.Lys446Asn	rifampicin	No
rpoB	p.Lys446Gln	rifampicin	Yes
rpoB	p.Met434Ile	rifampicin	Yes
rpoB	p.Met434Thr	rifampicin	No
rpoB	p.Phe424Leu	rifampicin	Yes
rpoB	p.Phe424Ser	rifampicin	No
rpoB	p.Phe424Val	rifampicin	Yes
rpoB	p.Phe433Leu	rifampicin	No
rpoB	p.Phe433Val	rifampicin	No
rpoB	p.Pro454Arg	rifampicin	Yes
rpoB	p.Pro454His	rifampicin	Yes
rpoB	p.Pro454Leu	rifampicin	Yes
rpoB	p.Pro454Ser	rifampicin	No
rpoB	p.Pro483Leu	rifampicin	Yes
rpoB	p.Ser428Arg	rifampicin	Yes
rpoB	p.Ser428Ile	rifampicin	No
rpoB	p.Ser428Thr	rifampicin	Yes
rpoB	p.Ser431Arg	rifampicin	Yes
rpoB	p.Ser431Gly	rifampicin	Yes
rpoB	p.Ser431Ile	rifampicin	No
rpoB	p.Ser431Thr	rifampicin	Yes
rpoB	p.Ser441Gln	rifampicin	Yes
rpoB	p.Ser441Leu	rifampicin	Yes
rpoB	p.Ser441Met	rifampicin	Yes
rpoB	p.Ser441Trp	rifampicin	No
rpoB	p.Ser441Val	rifampicin	Yes
rpoB	p.Ser472Ala	rifampicin	No
rpoB	p.Ser493Leu	rifampicin	Yes
rpoB	p.Thr400Ala	rifampicin	Yes
rpoB	p.Thr427Ala	rifampicin	No
rpoB	p.Thr427Pro	rifampicin	Yes
rpoB	p.Thr427Ser	rifampicin	Yes
rpoB	p.Thr444Ile	rifampicin	Yes
rpoB	p.Thr444Pro	rifampicin	Yes
rpoB	p.Thr482Pro	rifampicin	No
rpoB	p.Val170Phe	rifampicin	Yes
rpoC	p.Asp485Asn	rifampicin	Yes
rpoC	p.Asp735Asn	rifampicin	Yes
rpoC	p.Asp747Ala	rifampicin	Yes
rpoC	p.Gly332Arg	rifampicin	Yes
rpoC	p.Ile491Thr	rifampicin	Yes
rpoC	p.Ile885Val	rifampicin	Yes
rpoC	p.Leu527Val	rifampicin	Yes
rpoC	p.Phe452Ser	rifampicin	Yes
gid	c.102del	streptomycin	No
gid	c.103_104insG	streptomycin	No
gid	c.107del	streptomycin	No
gid	c.115del	streptomycin	No
gid	c.136del	streptomycin	No
gid	c.157del	streptomycin	No
gid	c.225_226insT	streptomycin	No
gid	c.294_295insAC	streptomycin	No
gid	c.297_298insA	streptomycin	No
gid	c.326del	streptomycin	No
gid	c.351del	streptomycin	No
gid	c.352_353insG	streptomycin	No
gid	c.366_367del	streptomycin	Yes
gid	c.386del	streptomycin	No
gid	c.390del	streptomycin	No
gid	c.400_401insT	streptomycin	No
gid	c.446_447insA	streptomycin	No
gid	c.450del	streptomycin	No
gid	c.452del	streptomycin	No
gid	c.455del	streptomycin	No
gid	c.471del	streptomycin	No
gid	c.519_520insA	streptomycin	No
gid	c.554_555insG	streptomycin	No
gid	c.559_572del	streptomycin	Yes
gid	c.58_59insT	streptomycin	No
gid	c.601del	streptomycin	No
gid	large_deletion	streptomycin	No
gid	p.Ala80Pro	streptomycin	Yes
rpsL	p.Arg86Pro	streptomycin	No
rpsL	p.Arg86Trp	streptomycin	No
rpsL	p.Arg9His	streptomycin	No
rpsL	p.Gly84Val	streptomycin	No
rpsL	p.Lys43Arg	streptomycin	Yes
rpsL	p.Lys43Thr	streptomycin	Yes
rpsL	p.Lys51Asn	streptomycin	No
rpsL	p.Lys88Arg	streptomycin	Yes
rpsL	p.Lys88Gln	streptomycin	Yes
rpsL	p.Lys88Met	streptomycin	Yes
rpsL	p.Lys88Thr	streptomycin	Yes
rpsL	p.Thr40Ile	streptomycin	No
rpsL	p.Thr41Ser	streptomycin	No
rpsL	p.Val52Gly	streptomycin	No
rpsL	p.Val87Leu	streptomycin	No
rpsL	p.Val93Met	streptomycin	No
rrs	r.190g>a	streptomycin	Yes
rrs	r.277g>c	streptomycin	Yes
rrs	r.427g>c	streptomycin	No
rrs	r.427g>t	streptomycin	No
rrs	r.462c>t	streptomycin	Yes
rrs	r.513c>t	streptomycin	Yes
rrs	r.514a>c	streptomycin	Yes
rrs	r.514a>t	streptomycin	Yes
rrs	r.516c>t	streptomycin	No
rrs	r.517c>t	streptomycin	Yes
rrs	r.628g>c	streptomycin	No
rrs	r.799c>t	streptomycin	Yes
rrs	r.888g>a	streptomycin	Yes
rrs	r.905c>a	streptomycin	Yes
rrs	r.905c>g	streptomycin	Yes
rrs	r.906a>g	streptomycin	Yes
rrs	r.907a>c	streptomycin	Yes
rrs	r.907a>t	streptomycin	Yes
rrs	r.908a>g	streptomycin	Yes
